1    **Syntaxin 17 promotes lipid droplet formation by regulating the distribution of**  
2    **acyl-CoA synthetase 3**

3

4

5

6

7    Hana Kimura<sup>1</sup>, Kohei Arasaki<sup>1</sup>, Yuki Ohsaki<sup>2</sup>, Toyoshi Fujimoto<sup>2</sup>, Mitsuo Tagaya<sup>1,\*</sup>

8

9    <sup>1</sup>School of Life Sciences, Tokyo University of Pharmacy and Life Sciences, Horinouchi,

10    Hachioji, Tokyo 192-0392; <sup>2</sup>Department of Anatomy and Molecular Cell Biology, Nagoya

11    University Graduate School of Medicine, Nagoya 466-8550, Japan

12

13    \*For correspondence: tagaya@toyaku.ac.jp

## 14    **Abstract**

15    Lipid droplets (LDs) are ubiquitous organelles that contain neutral lipids and are surrounded  
16    by a phospholipid monolayer. How proteins specifically localize to the phospholipid  
17    monolayer of the LD surface has been a matter of extensive investigations. Here we show  
18    that syntaxin 17 participates in LD biogenesis by regulating the distribution of acyl-CoA  
19    synthetase 3 (ACSL3), a key enzyme for LD biogenesis that redistributes from the  
20    endoplasmic reticulum to LDs during LD formation. Time course experiments revealed that  
21    syntaxin 17 binds to ACSL3 in the initial stage of LD formation, and that ACSL3 is released  
22    as a consequence of competitive binding of SNAP23 to syntaxin 17 in the maturation stage.  
23    We propose a model in which ACSL3 redistributes from the endoplasmic reticulum to LDs  
24    through association with syntaxin 17 and SNAP23-mediated dissociation from syntaxin 17.  
25    We also provide evidence that lipid raft-like structures are important for LD formation and  
26    SNAREs-ACSL3 interactions.

## 27 **Introduction**

28 Lipid droplets (LD) are ubiquitous organelles that store neutral lipids such as triacylglycerol  
 29 (TAG) and sterol esters, and play central roles in energy and lipid metabolism (*Walther and*  
 30 *Farese, 2012*). LDs are dynamic and diverse organelles, their size and number depending on  
 31 cellular energy and the metabolic state, and their protein and lipid compositions varying with  
 32 the cell type and the degree of LD maturation in individual cell types (*Ohsaki et al., 2014;*  
 33 *Pol et al., 2014; Thiam and Beller, 2017*). Moreover, LDs are in contact with many  
 34 organelles, including the endoplasmic reticulum (ER), mitochondria, and peroxisomes (*Gao*  
 35 *and Goodman, 2015; Ohsaki et al., 2017*). Recent studies revealed that LDs have additional  
 36 functions, such as in ER stress responses, protein storage, protein degradation, and viral  
 37 replication (*Stordeur et al., 2014; Welte, 2015*).

38 LDs are unique among cellular organelles in that they are surrounded by a phospholipid  
 39 monolayer. LD formation starts in the endoplasmic reticulum (ER) at pre-defined or random  
 40 sites (*Kassan et al., 2013; Thiam and Forêt, 2016*), with the formation of lipid lenses of  
 41 around 50 nm in the intermembrane space of the ER lipid bilayer (*Choudhary et al., 2015*).  
 42 The formation of lenses and their enlargement as a consequence of lateral fusion and/or  
 43 accumulation of more lipids generate curvature of the ER membrane. At this stage acyl-CoA  
 44 synthetase 3 (ACSL3), an enzyme that provides acyl-CoA for LD formation, moves within  
 45 the ER and becomes concentrated at emerging LD sites through its amphipathic  $\alpha$  helices  
 46 (*Kassan et al., 2013; Poppelreuther et al., 2012*). This enzyme is critical for LD expansion  
 47 and maturation. Loss or overexpression of other ACSL family members does not affect LD  
 48 biogenesis (*Kassan et al., 2013*), highlighting the importance of ACSL3-mediated local  
 49 synthesis of acyl-CoA for LD expansion. ACSL3 belongs to the class I LD proteins (*Kory et*  
 50 *al., 2016*), which are characterized by their presence in the ER without LDs and translocation  
 51 to the LD surface during LD formation or after reconnection of LDs to the ER via membrane

52 bridges (Wilfling *et al.*, 2013). Most class I proteins have hydrophobic regions with  
53 hairpin-like structures (Kory *et al.*, 2016). Emerging LDs expand and then are recognized by  
54 proteins such as perilipins. Perilipins are class II proteins containing amphipathic  $\alpha$  helices or  
55 other hydrophobic domains that move from the cytosol to the LD surface (Kory *et al.*, 2016).

56 Syntaxin 17 (Stx17) was originally characterized as a t-SNARE located in the smooth  
57 ER (Steegmaier *et al.*, 2000). Recent studies by us and other groups demonstrated that Stx17  
58 localizes to the mitochondria-ER interface, including the mitochondria-associated ER  
59 membrane (MAM) (Vance, 2014), and plays roles in mitochondrial division (Arasaki *et al.*,  
60 2015), the fusion of stress-induced mitochondrial-derived vesicles with lysosomes  
61 (McLelland *et al.*, 2016), and autophagy in starved cells (Diao *et al.*, 2015; Hamasaki *et al.*,  
62 2013; Itakura *et al.*, 2012; Takáts *et al.*, 2013). In mitochondrial division and autophagosome  
63 formation, Stx17 functions not as a SNARE, but as a scaffold at the MAM (Arasaki *et al.*,  
64 2015; Hamasaki *et al.*, 2013). For these functions and the MAM localization, the C-terminal  
65 hairpin-like hydrophobic domain (CHD) and the subsequent cytoplasmic tail of Stx17, but  
66 not its SNARE domain, are important (Arasaki *et al.*, 2015). The MAM is enriched in  
67 cholesterol and sphingolipids, thus resembling lipid raft-like structures (Chipuk *et al.*, 2012;  
68 Hayashi and Su, 2007; Sano *et al.*, 2009), although the ER membrane is very poor in  
69 cholesterol. The MAM has versatile functions (Vance, 2014), including the synthesis of  
70 neutral lipids as well as phospholipids (Rusiñol, *et al.*, 1994; Stone *et al.*, 2009).

71 In the present study we demonstrated that Stx17 is required for LD biogenesis. We  
72 found that Stx17 interacts with ACSL3, and facilitates its translocation from the ER to the  
73 surface of LDs.

74

## 75 **Results**

### 76 **Stx17 is required for LD biogenesis**



77 Although Stx17 is ubiquitously expressed, it is abundantly expressed in steroidogenic and  
 78 hepatic cells (*Steegmaier et al., 2000*), both of which have large numbers of LDs. This and  
 79 the MAM localization of Stx17 prompted us to examine the role of Stx17 in LD biogenesis.  
 80 We first examined whether Stx17 is required for LD biogenesis by silencing the protein. We  
 81 used two siRNAs (siRNA 440 and 194) that were able to effectively knockdown Stx17  
 82 (*Arasaki et al., 2015, and Figure 1A*), and found that the size and number of LDs were  
 83 significantly reduced in hepatic cells (HepG2 and Huh7 cells) depleted of Stx17 (*Figure 1B*,  
 84 *left two columns*). Silencing of Stx17 also inhibited oleic acid (OA)-induced LD biogenesis  
 85 in HeLa cells (*Figure 1B, right column*). In accordance with the inhibition of LD formation,  
 86 TAG synthesis was blocked in Stx17-silenced HeLa cells (*Figure 1C*). Of note is that Stx17  
 87 was not localized on the surface of LDs (*Figure 1B, top row*), suggesting that Stx17 does not  
 88 directly participate in LD biogenesis, but rather has a regulatory role. To verify the  
 89 physiological importance of Stx17 in LD biogenesis, we examined the effect of Stx17  
 90 silencing on the differentiation of 3T3-L1 preadipocytes into adipocytes. As differentiation  
 91 progressed, the expression level of Stx17 markedly increased (*Figure 1-figure supplement*  
 92 *1A*). Silencing of Stx17 inhibited adipocyte differentiation, as demonstrated by a reduced  
 93 increase in Oil-Red O staining (*Figure 1-figure supplement 1B,C*).

94 To gain an insight into the mechanism by which Stx17 participates in LD biogenesis,  
 95 we examined which domains of Stx17 are responsible for LD biogenesis. To address this, we  
 96 performed rescue experiments using siRNA (Stx17 (NC)) that targets the 3' non-coding  
 97 region of Stx17 (*Figure 1D*). In Stx17-silenced cells, FLAG-tagged Stx17 wild-type showed  
 98 restored size and number of LDs, excluding the possibility of an off-target effect of the  
 99 siRNAs used (*Figure 1E,F*). We examined the ability of several Stx17 mutants (*Figure*  
 100 *1-figure supplement 1D*) to compensate for Stx17 depletion. No rescue was observed for  
 101 Stx17 K254C in which Lys254 in the middle of the CHD was replaced by Cys, the CHD+C

mutant, or the  $\Delta$ SNARE mutant (*Figure 1E,F*), suggesting that both the SNARE domain and the CHD with the C-terminal cytoplasmic region, the latter of which is required for the MAM localization (*Arasaki et al., 2015*), are involved in LD biogenesis.

# **Depletion of Stx17 causes aberrant distribution of ACSL3 on the LD surface**

ACSL3, the most abundant acyl-CoA synthetase family member on LDs (*Brasaemle et al., 2004; Fujimoto et al., 2004*), redistributes from a microdomain of the ER to the LD surface during LD formation, and the enzymatic activity of ACSL3 plays a crucial role in LD expansion (*Fujimoto et al., 2007; Kassan et al., 2013*). On the other hand, depletion of ACSL4, the most abundant but non-LD-localized family member, does not affect LD formation, suggesting that the presence of ACSL on the LD surface is important for LD expansion (*Kassan et al., 2013*). Because TAG synthesis was markedly compromised in Stx17-depleted cells, we reasoned that Stx17 depletion might have caused ACSL3 dysfunction. Therefore, we examined the localization of ACSL3 in Stx17-depleted cells. As reported previously (*Kassan et al., 2013*), ACSL3 was detected on the surface of LDs exhibiting a circular distribution in mock-treated cells (*Figure 2A, left, upper row, B, top row*). In Stx17-silenced cells, on the other hand, ACSL3 exhibited a crescent-like distribution on the surface of LDs (*Figure 2A, left, lower row, B, second row*). Importantly, there was no difference in the circular distribution of Tip47/PLIN3, a LD-localized protein that redistributes from the cytosol, between mock- and Stx17-silenced cells (*Fig. 2A, right, B, third and bottom rows*). Quantification revealed that the recruitment of ACSL3 to the surface of LDs was specifically suppressed by Stx17 knockdown (*Figure 2C*).

To gain an additional morphological insight in Stx17-depleted cells, we performed electron microscopy. As shown in *Figure 2D,E*, the area of LDs that is in contact with the ER was significantly increased in Stx17-silenced cells. Because LDs bud from the ER and

127 finally become detached, our electron microscopic data suggest that LDs remain immature  
 128 and attached to the ER due to loss of Stx17. To directly test this, we performed FRAP  
 129 experiments. In mock-treated cells, the signals of LD-localized BODIPY FL-C16, a  
 130 membrane-permeable fatty acid that is efficiently incorporated into the triacylglycerol pool  
 131 (*Rambold et al., 2015; Somwar et al., 2011*), as well as those of GFP-HPos, which  
 132 redistributes from the ER to LDs during LD formation (*Kassan et al., 2013*), were not  
 133 recovered after photobleaching (*Figure 2F, left, and Figure 2-figure supplement 1A*),  
 134 consistent with the view that mature LDs become detached from the ER. On the other hand,  
 135 significant recovery of the signals derived from these probes was observed after  
 136 photobleaching of Stx17-silenced cells (*Figure 2F, right, and Figure 2-figure supplement 1B*),  
 137 implying that LDs remained associated with the ER. Nevertheless, little recovery was  
 138 observed for LD-localized GFP-ACSL3. In contrast to LD-localized GFP-ACSL3, an  
 139 ER-localized GFP-ACSL3 fraction was rapidly recovered regardless of whether Stx17 was  
 140 present or not (*Figure 2F and Figure 2-figure supplement 1A,B, bottom row*). These results  
 141 suggest that Stx17 is a critical factor for the escort of GFP-ACSL3 from the ER to LDs.

142

#### 143 **The GATE domain of ACSL3 is important for the interaction with the SNARE domain** 144 **of Stx17**

145 Because the redistribution of ACSL3 to LDs was suppressed in Stx17-silenced cells, Stx17  
 146 might regulate the localization of ACSL3 through protein-protein interaction. To test this  
 147 possibility, we performed immunoprecipitation and proximity ligation assay (PLA).  
 148 Significant amounts of GFP-tagged ACSL3 (*Figure 3A*) and endogenous ACSL3 (*Figure*  
 149 *3B*) were co-precipitated with FLAG-Stx17 wild-type and the K254C mutant, but not with  
 150 the  $\Delta$ SNARE mutant. Similar results were obtained for PLA (*Figure 3C and Figure 3-figure*  
 151 *supplement 1A*), suggesting that Stx17 interacts with ACSL3 via its SNARE domain. We

152 next examined which domains of ACSL3 are required for the interaction with Stx17. ACSL3  
153 has a transmembrane domain (TMD) and a GATE domain (*Figure 3D*), the latter of which is  
154 implicated in the control of access of the fatty acid substrate to the catalytic site of each of the  
155 two subunits (*Hisanaga et al., 2004; Soupene et al., 2010*). GFP-ACSL3 wild-type was  
156 found to decorate LDs (*Figure 3- figure supplement 1B, top row*). On the other hand, a  
157 dot-like distribution at the edge of LDs was observed for the  $\Delta$ GATE mutant (*middle row*),  
158 and expression of the  $\Delta$ TMD mutant reduced the number of LDs (*bottom row*). Binding  
159 experiments revealed that both the TMD and GATE domains of ACSL3 are required for the  
160 interaction with Stx17 (*Figure 3E*), although the  $\Delta$ GATE mutant as well as the wild-type  
161 protein may be close to Stx17 in the absence of OA (*Figure 3F*). These findings combined  
162 with the fact that the SNARE domain of Stx17 is required for LD formation (*Figure 1E,F*)  
163 suggest that the interaction of ACSL3 with Stx17 is important for the redistribution of  
164 ACSL3 to LDs.

165 We next examined whether Stx17 regulates the localization of other enzymes that  
166 function in LD biogenesis. Lysophosphatidylcholine acyltransferase 1/2 (LPCAT1/2) are  
167 lipid synthesis enzymes that are related to the Lands cycle and relocate from the ER to LDs  
168 during LD maturation to regulate the size of LDs (*Moessinger et al., 2011, 2014*).  
169 Diacylglycerol acyltransferase 1/2 (DGAT1/2) produce TAG, and DGAT2 is known to  
170 localize to LDs as well as MAMs (*Kuerschner et al., 2008; Stone et al., 2009; Wilfling et al.,*  
171 *2013*). Among these enzymes, Stx17 interacts with LPCAT1 (*Figure 3 - figure supplement*  
172 *1C,D*) and regulates its distribution (*figure supplement 1E*), whereas no significant  
173 translocation defect was observed for LPCAT2, the closest homologue of LPCAT1 among  
174 the LPCAT family proteins (*Shindou and Shimizu, 2009*). These findings suggest that Stx17  
175 specifically regulates the redistribution of some enzymes to LDs through protein-protein  
176 interactions.

177

## 178 **SNAP23 localizes to the MAM**

179 Given that Stx17 regulates the redistribution of ACSL3 from the ER to LDs likely through  
180 protein-protein interaction, we reasoned that other protein(s) might modulate this interaction.  
181 We focused on SNAP23 because previous studies revealed the involvement of this protein in  
182 lipid droplet formation and localization (*Boström et al., 2007; Jägerström et al. 2009*), and  
183 our interactome analysis identified SNAP23 as an Stx17-interacting protein (data not shown).  
184 We examined whether SNAP23, like Stx17, localizes to the MAM, in addition to the ER and  
185 mitochondria. As shown in *Figure 4A*, SNAP23 was found to be highly enriched in the  
186 MAM fraction. Of note is that a significant amount of ACSL3 was also recovered in the  
187 MAM fraction.

188 Silencing of SNAP23 (*Figure 4B*) markedly reduced the size of LDs, as previously  
189 reported (*Boström et al., 2007; Jägerström et al. 2009*), with a disrupted distribution of  
190 ACSL3 on LDs (*Figure 4C,D*), reminiscent of that observed in Stx17-silenced cells (*Figure*  
191 *2A,B*). SNAP23 depletion caused a change in the distribution of Stx17 from a  
192 mitochondria-like pattern to a pattern with punctate structures (*Figure 4E, left, second and*  
193 *bottom rows*). Our previous study showed that the distribution of Stx17 is significantly  
194 perturbed upon treatment of cells with a low concentration (30 µg/ml) of digitonin  
195 (*Arasaki et al., 2015*), a reagent that can efficiently extract cholesterol (*Oliferenko et al., 1999*).  
196 This likely reflects the fact that the MAM is enriched in cholesterol and sphingolipids, thus  
197 resembling lipid raft-like structures (*Chipuk et al., 2012; Hayashi and Su, 2007; Sano et al.,*  
198 *2009*). We found that punctate Stx17-positive structures in SNAP23-depleted cells were  
199 relatively resistant to 30 µg/ml digitonin treatment (*Figure 4E, right, second and bottom*  
200 *rows*) compared to the mitochondria-like distribution of Stx17 in mock-treated cells (*top and*  
201 *third rows*). This suggests that Stx17 failed to gain access to raft-like structures in the absence

202 of SNAP23.

203

## 204 **SNAP23 and ACSL3 bind exclusively to Stx17**

205 We next determined the region of Stx17 responsible for the interaction with SNAP23 by  
 206 immunoprecipitation (*Figure 5A*) and PLA (*Figure 5B*). As expected, the interaction of  
 207 Stx17 with SNAP23 was abolished on deletion of the SNARE domain of Stx17 (*Figure 5A*,  
 208 *lane 8, B*). Interestingly, the interaction was drastically reduced on mutation at Lys254  
 209 located in the middle of the CHD, even though the resultant mutant retained the SNARE  
 210 domain (*Figure 5A, lane 7,B*).

211 Because both ACSL3 and SNAP23 interact with the SNARE domain of Stx17, we  
 212 sought to determine whether they bind to Stx17 in a synergic or competitive manner. When  
 213 SNAP23 was knocked down, the number of PLA dots representing the proximity between  
 214 Stx17 and ACSL3 was significantly increased (*Figure 5C*), whereas ectopic expression of  
 215 SNAP23 reduced the number of the PLA dots (*Figure 5D*). Furthermore, in cells expressing  
 216 GFP-ACSL3 wild-type but not mutants lacking the ability to bind Stx17, i.e., the  $\Delta$ GATE  
 217 and  $\Delta$ TMD mutants, the proximity of Stx17 to SNAP23 was disrupted (*Figure 5E*). These  
 218 findings suggest that SNAP23 and ACSL3 compete for Stx17 binding.

219

## 220 **The MAM, but not tethering between the MAM and mitochondria, is important for** 221 **LD formation**

222 Next, we examined the effect of depletion of PACS-2, a multifunctional sorting protein that  
 223 is required for maintaining MAM integrity (*Myhill et al., 2008; Simmen et al., 2005*), and  
 224 mitofusin 2 (Mfn2), a key tether for ER-mitochondria (*Naon et al., 2016*). As shown in  
 225 *Figure 6A*, Mfn2 depletion did not affect OA-induced LD formation, whereas PACS-2 was  
 226 found to be required for LD formation. Consistent with these findings, the proximity signal

227 for FLAG-Stx17 and ACSL3 was reduced upon depletion of PACS-2, but not Mfn2, and OA  
228 increased the signal (*Figure 6B*).

229 We assessed the Stx17 milieu in cells depleted of PACS-2 or Mfn2 by means of  
230 digitonin sensitivity. Although some punctate Stx17-positive structures were observed in  
231 Mfn2-silenced cells, they were mostly abolished by digitonin treatment (*Figure 6C, middle*  
232 *row*). Similar to those observed in SNAP23-depleted cells, on the other hand, prominent  
233 punctate Stx17-positive structures were resistant to digitonin treatment (*bottom row*),  
234 suggesting that Stx17 fails to localize to raft-like structures in cells depleted of PACS-2 as  
235 well as SNAP23. Alternatively, raft-like structures might have been disrupted upon depletion  
236 of PACS-2.

237

## 238 **Transient binding of Stx17 to ACSL3 during LD formation**

239 Given that SNAP23 and ACSL3 compete for Stx17 binding, one attractive hypothesis for the  
240 regulation of the redistribution of ACSL3 from the ER to nascent LDs due to Stx17 and  
241 SNAP23 is that at the onset of LD formation ACSL3 first binds to Stx17, and then SNAP23  
242 competitively binds to Stx17, releasing ACSL3 from Stx17 to allow its redistribution to the  
243 LD surface. To test this hypothesis, we monitored the change of the binding partner during  
244 LD maturation. Immunoprecipitation (*Figure 7A*) and PLA (*Figure 7B*) revealed that the  
245 binding of ACSL3 to Stx17 was augmented at 1-hr incubation with OA and then decreased,  
246 whereas the binding of Stx17 to SNAP23 increased up to 6 hr.

247

## 248 **Discussion**

249 The protein and lipid compositions of LDs vary not only with the cell type but also in the  
250 degrees of LD maturation and consumption in individual cell types (*Ohsaki et al., 2014; Pol*  
251 *et al., 2014; Thiam and Beller, 2017*). The importance of the recruitment of proteins to LDs



252 in LD biogenesis is highlighted by the finding that depletion of LD-localized ACSL3  
253 impaired LD formation, whereas depletion of the most abundant but non-LD-localized  
254 member of the ACSL family, ACSL4, had no impact on LD biogenesis (*Kassan et al., 2013*),  
255 suggesting that on site supply of acetyl-CoA is necessary for the growth of LDs. Therefore,  
256 how proteins selectively bind to the LD surface, which is surrounded by a phospholipid  
257 monolayer, in a maturation stage-dependent manner is one of the most key questions to be  
258 addressed in LD biogenesis. In this study, we demonstrated that Stx17, a SNARE protein  
259 localized in the MAM, in conjunction with another MAM protein, SNAP23, regulates the  
260 translocation of ACSL3 and perhaps LPCAT1 from the ER to nascent LDs. On the other  
261 hand, the distribution of some LD-localized proteins such as DGAT2 and Tip47/PLIN3,  
262 which translocate from the ER and cytosol to LDs, respectively, was found to be independent  
263 of Stx17. These findings suggest that Stx17 selectively interacts with and regulates the  
264 localization of a subset of proteins for LD biogenesis.

265 We found that the SNARE domain and Lys254 in the middle of the CHD of Stx17 are  
266 important for LD biogenesis. The SNARE domain of Stx17 was found to be responsible for  
267 the interaction with ACSL3 and SNAP23. For binding to SNAP23, not only the SNARE  
268 domain of Stx17, but also Lys254, which is a critical residue for MAM localization (*Arasaki*  
269 *et al., 2015*), is important. In the absence of SNAP23, Stx17 localization was relatively  
270 resistant to digitonin treatment. The resistibility of Stx17 to digitonin was also acquired on  
271 loss of PACS-2, a MAM organizer (*Myhill et al., 2008; Simmen et al., 2005*). Based on the  
272 time course experiment results (*Figure 7A,B*) and other data, we envisage that the interaction  
273 of Stx17 and ACSL3 begins at non-raft like structures at the onset of LD formation (*Figure*  
274 *7C*), and then ACSL3 is released from Stx17 due to the binding of SNAP23 to Stx17 at  
275 digitonin-sensitive sites, likely lipid raft-like structures. SNAP23 is known to be  
276 palmitoylated at several Cys residues located in the middle of the protein (*Vogel and Roche,*



1999), and this modification is required for the membrane attachment and/or raft association of SNAP23 (*Salaün et al., 2005*). Palmitoylation is a signal for targeting of proteins to raft structures (*Salaün et al., 2010*) and the MAM (*Lynes et al., 2012*). Finally, ACSL3 enters the phospholipid monolayer surrounding LDs, where the mobility of ACSL3 is highly restricted compared to in the ER.

Although the SNARE domain of Stx17 is important for LD biogenesis, we do not favor the idea that Stx17 participates in the formation of bridges that connect the ER and nascent LDs or, as proposed previously for Stx5 (*Boström et al., 2007*), LD fusion. After initial formation, LDs retain functional connection with the ER through membrane bridges (*Jacquier et al., 2011; Wilfling et al., 2013*), and a subset of proteins (class I proteins: *Kory et al., 2016*) translocate to LDs likely through these bridges (*Ingelmo-Torres et al., 2009; Wilfling et al., 2013; Zehmer et al., 2008*). FRAP experiments after maturation of LDs revealed that LDs are not connected with the ER in mock-treated cells, whereas in Stx17-depleted cells LDs are still in contact with the ER, as shown by the recovery of fluorescence of BODIPY FL-C16 and GFP-HPos. This is in line with the electron microscopic data revealing the close vicinity of small LDs to the ER membrane. Our idea that Stx17 is not involved in the formation of ER-LD bridges is supported by the finding that knockdown of Sec22b, a cognate v-SNARE for Stx17 (*Steegmaier et al., 2000*), does not affect LD formation (*data not shown*).

A recent study revealed that seipin, a transcript of the BSCL2 gene whose mutation causes severe congenital lipodystrophy (*Magré et al., 2001*), regulates the translocation of ACSL3 and lipids into LDs (*Salo et al., 2016*). Another recent study revealed that seipin suppresses the activity of glycerol-3-phosphate acyltransferase to prevent the formation of excess phosphatidic acid (*Pagac et al., 2016*). Both proteins are key enzymes for LD formation. Seipin and its yeast homologue, Fld1, localize to ER-LD contact sites (*Szymanski*

302 *et al.*, 2007; Wang *et al.*, 2016), and loss of Fld1 or its partner, Ldb16, yields LDs with  
 303 aberrant lipid and protein compositions (Fei *et al.*, 2011; Wang *et al.*, 2014; Cartwright *et al.*,  
 304 2015; Grippa *et al.*, 2015). Although seipin/Fld1 is conserved, Ldb16 is not present in  
 305 mammals. Wang *et al.* (2014) postulated that Fld1 and Ldb16 in yeast might have evolved  
 306 into a single molecule, seipin, in mammals. Our present observations revealed another  
 307 protein that regulates the translocation of key enzymes from the ER to nascent LDs.  
 308 Different from Fld1, Stx17 is not localized in ER-LD contact sites nor conserved in yeast.  
 309 However, Stx17 is one of the Last Eukaryotic Common Ancestors (LECAs) and present in  
 310 diverse eukaryotic organisms, but was also lost in multiple lineages (Arasaki *et al.*, 2015). In  
 311 organisms lacking Stx17 the role of Stx17 in LD formation may be assumed by another  
 312 protein. Of note is that despite the absence of an obvious homologue in yeast, Stx17 plays  
 313 pivotal roles at the initial and late stages in autophagy, a well-conserved and important  
 314 process in eukaryotes (Hamasaki *et al.*, 2013; Itakura *et al.*, 2012).

315

## 316 **Materials and methods**

317

## 318 **Chemicals and antibodies**

319 Triacsin C, digitonin, and OA were obtained from Enzo Life Sciences, Wako Chemicals, and  
 320 Sigma-Aldrich, respectively. Lipid Tox and BODIPY FL-C16 were obtained from Thermo  
 321 Fisher Scientific. The following antibodies were purchased from Sigma-Aldrich: monoclonal  
 322 FLAG (No. F3165) and polyclonal FLAG (No. F7425). The following antibodies were  
 323 obtained from BD Bioscience Pharmingen: CNX (No. 610523), and Tom20 (No. 612278).  
 324 The following antibodies were purchased from Proteintech: PACS-2 (No. 19508-1-AP),  
 325 polyclonal SNAP23 (No. 10825-1-AP), and SNAP29 (No. 12704-1-AP). The following  
 326 antibody was purchased from Santa Cruz Biotechnology: monoclonal SNAP23 (D-11:

sc-374215). The following antibodies were from the indicated sources: HA (Sigma-Aldrich, H6908), Mfn2 (Abcam, ab56889), Alexa Fluor® 488 and 594 goat anti-mouse and -rabbit antibodies (Thermo Fisher Scientific, No. A-11001, A-11005, A-11008, and A-11012), and Sec61β (EMD Millipore, No. 07-205). An antibody against Stx17 was prepared as described previously (Arasaki *et al.*, 2015) and used for immunofluorescence analysis. For immunoblotting, an anti-Stx17 antibody (Sigma-Aldrich; No. HPA001204) was used.

### Cell culture

293T, HepG2, Huh7, and 3T3-L1 cells were grown in DMEM supplemented with 50 IU/ml penicillin, 50 µg/ml streptomycin, and 10% fetal calf serum. HeLa cells (RIKEN, RCB0007) were cultured in α-MEM supplemented with the same materials plus 2 mM L-glutamine. Stable transfectants were prepared as described previously (Arasaki *et al.*, 2015). For the induction of LDs in HeLa cells, OA was added at a final concentration of 150 µM.

### Plasmids and transfection

Plasmids encoding human Stx17 full-length and its derivatives were described previously (Arasaki *et al.*, 2015). The plasmids for GFP-ACSL3, FLAG-DGAT1/2, and 3x-HA-LPCAT1/2 were gifts from Dr. Albert Pol (IDIBAPS), Dr. Robert V. Farese (Harvard University), and Dr. Christoph Thiele (University of Bonn), respectively. Deletion mutants of ACSL3 were constructed by inverse PCR. Transfection was carried out using LipofectAMINE Plus, LipofectAMINE2000 (Thermo Fisher Scientific), or PEI (Longo *et al.*, 2013) according to the manufacturer's protocol.

### RNA interference

The following siRNAs were used:

352 Stx17 (440) : 5'-GGUAGUUCUCAGAGUUUGAUU-3'  
 353 Stx17 (194) : 5'-CGAUCCAAUAUCCGAGAAAU-3'  
 354 Stx17 (NC) : 5'-GGAAAUUAAUGAUGUAAGA-3'  
 355 Stx17 (421) : 5'-CACACUGGGGAGGCUGAAGCU-3'  
 356 Mfn2: 5'-AGAGGGCCUUAAGCGCCA-3'  
 357 PACS2: 5'-AACACGCCCUGCCCAUGAAC-3'  
 358 SNAP23: 5'-CAUUAACGCAUAACUAAU-3'  
 359 SNAP29: 5'-UAUCAUCCAGCUUUCUAAGGUUUGG-3'

360 siRNAs were purchased from Japan Bio Services. HeLa, HepG2, Huh7, and 3T3-L1 cells  
 361 were grown on 35-mm dishes, and siRNAs were transfected at a final concentration of 200  
 362 nM using Oligofectamine, LipofectAMINE2000, or LipofectAMINE2000 RNAi Max  
 363 (Thermo Fisher Scientific) according to the manufacturer's protocol.

364

### 365 **Immunoprecipitation**

366 HeLa cells expressing FLAG-tagged proteins were lysed in lysis buffer (20 mM  
 367 Hepes-KOH (pH 7.2), 150 mM KCl, 2 mM EDTA, 1 mM dithiothreitol, 1 µg/ml leupeptin,  
 368 1 µM pepstatin A, 2 µg/ml aprotinin, and 1 mM phenylmethylsulfonyl fluoride) containing  
 369 1% Triton X-100 or 10 mg/ml digitonin. After centrifugation, the supernatants were  
 370 collected and immunoprecipitated with anti-FLAG M2 affinity beads (Sigma-Aldrich). The  
 371 precipitated proteins were eluted with SDS sample buffer, and then analyzed by  
 372 immunoblotting. Experiments were repeated two or three times with similar results.

373

### 374 **Immunofluorescence microscopy**

375 For immunofluorescence microscopy, cells were fixed with 4% paraformaldehyde for 20  
 376 min at room temperature or ice-cold methanol at -20°C, and then observed under an

377 Olympus Fluoview 300 or 1000 laser scanning microscope. Unless specifically stated,  
378 shown in figures are representative images of at least three independent experiments. To  
379 determine the fluorescence intensity ratio (*Figures 2C and 4D*), immunofluorescence images  
380 obtained were analyzed using ImageJ software (NIH).

381

## 382 **Electron microscopy**

383 Cells were fixed with a mixture of 2% formaldehyde and 2.5% glutaraldehyde in 0.1 M  
384 sodium cacodylate buffer (pH 7.4) for 2 hr, and then prepared for conventional observation  
385 as described previously (*Ohsaki et al., 2016*). ER-LD contact length and the circumference  
386 of each LD were determined with ImageJ software. ER-LD contact sites were discerned  
387 when the distance between the ER membrane and the surface of an LD was 20 nm or less.

388

## 389 **FRAP**

390 FRAP experiments were performed with an Olympus Fluoview 1000 laser scanning  
391 microscope equipped with a stage-top incubator (37°C, 5% CO<sub>2</sub>). To monitor LDs during  
392 FRAP experiments, cells expressing GFP constructs or labeled with BODIPY FL-C16 were  
393 incubated with Lipid Tox in Opti-MEM supplemented with 10% fetal calf serum before  
394 photobleaching. The minimum region defined with the Olympus Fluoview 1000 laser  
395 scanning microscope was photobleached using a 488-nm laser at 100% laser power for 2 s.  
396 After photobleaching, images were obtained at 0.5 s intervals. In each experiment 30 cells  
397 were used, and more than 3 LDs in each cell were bleached. Experiments were repeated  
398 three times,

399

## 400 **Differentiation of 3T3-L1 cells and measurement of intensity of Oil Red O staining**

401 Differentiation was induced using an AdipoInducer Reagent (for animal cell) kit (Takara Bio,  
402 MK429) according to the manufacturer's protocol. Briefly, 3T3-L1 cells were  
403 mock-transfected or transfected with siRNA Stx17 (421). At 72 hr after transfection, cells  
404 were incubated with DMEM supplemented with 50 IU/ml penicillin, 50 µg/ml streptomycin,  
405 and 10% fetal calf serum, plus 10 µg/ml insulin solution, 2.5 µM dexamethasone, and 0.5  
406 mM 3-isobutyl-1-methylxanthine, for 48 hr. The medium was replaced with DMEM  
407 containing 10 µg/ml insulin, and then incubated for ~9 days. For Oil Red O staining, cells  
408 were fixed, washed with 60% isopropanol for 1 min, and then incubated with a 60% Oil Red  
409 O solution (99% isopropanol/0.3% Oil Red O) for 15 min at 37°C. After washing with 60%  
410 isopropanol and drying, Oil Red O was dissolved in 100% isopropanol and the OD at 500  
411 nm was measured.

412

### 413 **PLA**

414 PLA was conducted using a PLA kit (Sigma-Aldrich) according to the manufacturer's  
415 protocol. Thirty cells were analyzed in each assay. PLA dots were identified using the  
416 "analyze particle" program in the ImageJ software. Randomly, 30 cells were selected and the  
417 number of PLA dots was measured in each sample, and the experiments were repeated three  
418 times.

419

### 420 **Subcellular fractionation**

421 Subcellular fractionation was performed as described previously (*Arasaki et al., 2015*).  
422 Experiments were repeated two or three times with similar results.

423

### 424 **Digitonin treatment**

425 Digitonin was freshly dissolved in DMSO before use. Cells were incubated for 5 min at  
426 room temperature with 30 µg/ml digitonin in KHM buffer (25 mM Hepes (pH 7.2), 125 mM  
427 potassium acetate, 2.5 mM magnesium acetate, 1 mM dithiothreitol, and 1 mg/ml glucose).

428

#### 429 **Statistical analyses**

430 The results were averaged, expressed as the mean ± SD or SEM, and analyzed using a paired  
431 Student's t test. The p values are indicated by asterisks in the figures with the following  
432 notations: \* $p \leq 0.05$ ; \*\* $p \leq 0.01$ ; \*\*\* $p \leq 0.001$ . NS, not significant.

433

#### 434 **Acknowledgements**

435 We thank Dr. Albert Pol, Dr. Christoph Thiele, Dr. Robert V. Farese, and the Gladstone  
436 Institutes, UCSF, for the generous gifts of plasmids. We are indebted to Ms. Risako Yoshida,  
437 Mr. Toshiki Amemiya, and Ms. Miwa Yokoyama for their technical assistance. This work  
438 was supported in part by Grants-in-Aid for Scientific Research, #25291029 and #26650066  
439 (to M.T.), and #26111520 and #26713016 (to K.A.), and the MEXT-Supported Program for  
440 the Strategic Research Foundation at Private Universities (to M.T., and K.A.) from the  
441 Ministry of Education, Culture, Sports, Science and Technology of Japan.

442

#### 443 **Author contributions**

444 HK, Conception and design, Acquisition of data, Analysis and interpretation of data,  
445 Drafting; KA, Conception and design, Acquisition of data, Analysis and interpretation of  
446 data, Drafting; MT, Conception and design, Drafting; UO, Acquisition of data, Analysis and  
447 interpretation of data; TF, Analysis and interpretation of data.

448

#### 449 **Competing interests**

450 The authors declare that no competing interests exist.



# References

- Arasaki K, Shimizu H, Mogari H, Nishida N, Hirota N, Furuno A, Kudo Y, Baba M, Baba N, Cheng J, Fujimoto T, Ishihara N, Ortiz-Sandoval C, Barlow LD, Raturi A, Dohmae N, Wakana Y, Inoue H, Tani K, Dacks JB, Simmen T, Tagaya M. 2015. A role for the ancient SNARE syntaxin 17 in regulating mitochondrial division. *Developmental Cell* **32**:304-317. doi: 10.1016/j.devcel.2014.12.011
- Boström P, Andersson L, Rutberg M, Perman J, Lidberg U, Johansson BR, Fernandez-Rodriguez J, Ericson J, Nilsson T, Borén J, Olofsson SO. 2007. SNARE proteins mediate fusion between cytosolic lipid droplets and are implicated in insulin sensitivity. *Nature Cell Biology* **9**:1286-1293.
- Brasaemle DL, Dolios G, Shapiro L, Wang R. 2004. Proteomic analysis of proteins associated with lipid droplets of basal and lipolytically stimulated 3T3-L1 adipocytes. *The Journal of Biological Chemistry* **279**:46835-46842.
- Cartwright BR, Binns DD, Hilton CL, Han S, Gao Q, Goodman JM. 2015. Seipin performs dissectible functions in promoting lipid droplet biogenesis and regulating droplet morphology. *Molecular Biology of the Cell* **26**:726-739. doi: 10.1091/mbc.E14-08-1303
- Chipuk JE, McStay GP, Bharti A, Kuwana T, Clarke CJ, Siskind LJ, Obeid LM, Green DR. 2012. Sphingolipid metabolism cooperates with BAK and BAX to promote the mitochondrial pathway of apoptosis. *Cell* **148**:988-1000. doi: 10.1016/j.cell.2012.01.038
- Choudhary V, Ojha N, Golden A, Prinz WA. 2015. A conserved family of proteins facilitates nascent lipid droplet budding from the ER. *The Journal of Cell Biology* **211**:261-271. doi: 10.1083/jcb.201505067
- Diao J, Liu R, Rong Y, Zhao M, Zhang J, Lai Y, Zhou Q, Wilz LM, Li J, Vivona S, Pfuetzner RA,

476 Brunger AT, Zhong Q. 2015. ATG14 promotes membrane tethering and fusion of  
477 autophagosomes to endolysosomes. *Nature* **520**:563-566. doi: 10.1038/nature1414

478 Fei W, Zhong L, Ta MT, Shui G, Wenk MR, Yang H. 2011. The size and phospholipid  
479 composition of lipid droplets can influence their proteome. *Biochemical and*  
480 *Biophysical Research Communications* **415**:455-462. doi: 10.1016/j.bbrc.2011.10.091

481 Fujimoto Y, Itabe H, Kinoshita T, Homma KJ, Onoduka J, Mori M, Yamaguchi S, Makita  
482 M, Higashi Y, Yamashita A, Takano T. 2007. Involvement of ACSL in local  
483 synthesis of neutral lipids in cytoplasmic lipid droplets in human hepatocyte HuH7.  
484 *The Journal of Lipid Research* **48**:1280-1292.

485 Fujimoto Y, Itabe H, Sakai J, Makita M, Noda J, Mori M, Higashi Y, Kojima S, Takano T.  
486 2004. Identification of major proteins in the lipid droplet-enriched fraction isolated  
487 from the human hepatocyte cell line HuH7. *Biochimica et Biophysica Acta*  
488 **1644**:47-59.

489 Gao Q, Goodman JM. 2015. *Frontier in Cell and Developmental Biology* **3**:49. doi:  
490 10.3389/fcell.2015.00049

491 Grippa A, Buxó L, Mora G, Funaya C, Idrissi FZ, Mancuso F, Gomez R, Muntanya J,  
492 Sabidó E, Carvalho P. 2015. The seipin complex Fld1/Ldb16 stabilizes ER-lipid  
493 droplet contact sites. *The Journal of Cell Biology* **211**:829-844. doi:  
494 10.1083/jcb.201502070

495 Hamasaki M, Furuta N, Matsuda A, Nezu A, Yamamoto A, Fujita N, Oomori H, Noda T,  
496 Haraguchi T, Hiraoka Y, Amano A, Yoshimori T. 2013. Autophagosomes form at  
497 ER-mitochondria contact sites. *Nature* **495**:389-393. doi: 10.1038/nature11910

498 Hayashi T, Su TP. 2007. Sigma-1 receptor chaperones at the ER-mitochondrion interface regulate  
499  $\text{Ca}^{2+}$  signaling and cell survival. *Cell* **131**:596-610.

500 Hisanaga Y, Ago H, Nakagawa N, Hamada K, Ida K, Yamamoto M, Hori T, Arii Y, Sugahara M,

501 Kuramitsu S, Yokoyama S, Miyano M. 2004. Structural basis of the substrate specific  
502 two-step catalysis of long chain fatty acyl-CoA synthetase dimer. *The Journal of*  
503 *Biological Chemistry* **279**:31717-31726.

504 Ingelmo-Torres M, González-Moreno E, Kassan A, Hanzal-Bayer M, Tebar F, Herms A,  
505 Grewal T, Hancock JF, Enrich C, Bosch M, Gross SP, Parton RG, Pol A. 2009.  
506 Hydrophobic and basic domains target proteins to lipid droplets. *Traffic*  
507 **10**:1785-1801. doi:10.1111/j.1600-0854.2009.00994.x

508 Itakura E, Kishi-Itakura C, Mizushima N. 2012. The hairpin-type tail-anchored SNARE  
509 syntaxin 17 targets to autophagosomes for fusion with endosomes/lysosomes. *Cell*  
510 **151**:1256-1269. doi: 10.1016/j.cell.2012.11.001

511 Jägerström S, Polesie S, Wickström Y, Johansson BR, Schröder HD, Højlund K, Boström P.  
512 2009. Lipid droplets interact with mitochondria using SNAP23. *Cell Biology*  
513 *International* **33**:934-940. doi: 10.1016/j.cellbi.2009.06.011

514 Jacquier N, Choudhary V, Mari M, Toulmay A, Reggiori F, Schneider R. 2011. Lipid  
515 droplets are functionally connected to the endoplasmic reticulum in *Saccharomyces*  
516 *cerevisiae*. *Journal of Cell Science* **124**:2424-2437. doi: 10.1242/jcs.076836

517 Kassan A, Herms A, Fernández-Vidal A, Bosch M, Schieber NL, Reddy BJ, Fajardo A,  
518 Gelabert-Baldrich M, Tebar F, Enrich C, Gross SP, Parton RG, Pol A. 2013.  
519 Acyl-CoA synthetase 3 promotes lipid droplet biogenesis in ER microdomains. *The*  
520 *Journal of Cell Biology* **203**:985-1001. doi: 10.1083/jcb.201305142

521 Kory N, Farese RV Jr, Walther TC. 2016. Targeting Fat: Mechanisms of Protein Localization  
522 to Lipid Droplets. *Trends in Cell Biology* **26**:535-546. doi: 10.1016/j.tcb.2016.02.007

523 Kuerschner L, Moessinger C, Thiele C. 2008. Imaging of lipid biosynthesis: how a neutral  
524 lipid enters lipid droplets. *Traffic* **9**:338-352.

525 Longo PA, Kavran JM, Kim MS, Leahy DJ. (2013). Transient mammalian cell transfection

526 with polyethylenimine (PEI). *Methods in Enzymology* **529**:227-240. doi:  
527 10.1016/B978-0-12-418687-3.00018-5

528 Lynes EM, Bui M, Yap MC, Benson MD, Schneider B, Ellgaard L, Berthiaume LG,  
529 Simmen T. 2012, Palmitoylated TMX and calnexin target to the  
530 mitochondria-associated membrane. *The EMBO Journal* **31**:457-470. doi:  
531 10.1038/emboj.2011.384

532 Magré J, Delépine M, Khallouf E, Gedde-Dahl T Jr, Van Maldergem L, Sobel E, Papp J,  
533 Meier M, Mégarbané A, Bachy A, Verloes A, d'Abronzio FH, Seemanova E, Assan R,  
534 Baudic N, Bourut C, Czernichow P, Huet F, Grigorescu F, de Kerdanet M, et al. 2001.  
535 Identification of the gene altered in Berardinelli-Seip congenital lipodystrophy on  
536 chromosome 11q13. *Nature Genetics* **28**:365-370.

537 McLelland GL, Lee SA, McBride HM, Fon EA. 2016. Syntaxin-17 delivers  
538 PINK1/parkin-dependent mitochondrial vesicles to the endolysosomal system. *The*  
539 *Journal of Cell Biology* **214**:275-91. doi: 10.1083/jcb.201603105

540 Moessinger C, Klizaite K, Steinhagen A, Philippou-Massier J, Shevchenko A, Hoch M,  
541 Ejlsing CS, Thiele C. 2014. Two different pathways of phosphatidylcholine synthesis,  
542 the Kennedy Pathway and the Lands Cycle, differentially regulate cellular  
543 triacylglycerol storage. *BMC Cell Biology* **15**:43. doi: 10.1186/s12860-014-0043-3

544 Moessinger C, Kuerschner L, Spandl J, Shevchenko A, Thiele C. 2011. Human  
545 lysophosphatidylcholine acyltransferases 1 and 2 are located in lipid droplets where  
546 they catalyze the formation of phosphatidylcholine. *The Journal of Biological*  
547 *Chemistry* **286**:21330-21339. doi: 10.1074/jbc.M110.202424

548 Myhill, N., Lynes, E.M., Nanji, J.A., Blagoveshchenskaya, A.D., Fei, H., Carmine Simmen,  
549 K., Cooper, T.J., Thomas, G., and Simmen, T. (2008). The subcellular distribution of  
550 calnexin is mediated by PACS-2. *Molecular Biology of the Cell* **19**:2777-2788. doi:

10.1091/mbc.E07-10-0995

Naon D, Zaninello M, Giacomello M, Varanita T, Grespi F, Lakshminaranayan S, Serafini A, Semenzato M, Herkenne S, Hernández-Alvarez MI, Zorzano A, De Stefani D, Dorn GW 2nd, Scorrano L. 2016. Critical reappraisal confirms that Mitofusin 2 is an endoplasmic reticulum-mitochondria tether. *Proceedings of the National Academy of Sciences of the United States of America* **113**:11249-11254.

Ohsaki Y, Kawai T, Yoshikawa Y, Cheng J, Jokitalo E, Fujimoto T. 2016. PML isoform II plays a critical role in nuclear lipid droplet formation. *The Journal of Cell Biology* **212**:29-38. doi: 10.1083/jcb.201507122

Ohsaki Y, Suzuki M, Fujimoto T. 2017. The lipid droplet and the endoplasmic reticulum. In *Organelle contact sites: from molecular mechanism to disease*. Tagaya M and Simmen T (Editors) In *Advances in Experimental Medicine and Biology* vol. 997 Switzerland: Springer, in press.

Ohsaki Y, Suzuki M, Fujimoto T. 2014. Open questions in lipid droplet biology. *Chemistry and Biology* **21**:86-96. doi: 10.1016/j.chembiol.2013.08.009

Oliferenko S, Paiha K, Harder T, Gerke V, Schwärzler C, Schwarz H, Beug H, Günthert U, Huber LA. 1999. Analysis of CD44-containing lipid rafts: Recruitment of annexin II and stabilization by the actin cytoskeleton. *The Journal of Cell Biology* **146**:843–854.

Pagac M, Cooper DE, Qi Y, Lukmantara IE, Mak HY, Wu Z, Tian Y, Liu Z, Lei M, Du X, Ferguson C, Kotevski D, Sadowski P, Chen W, Boroda S, Harris TE, Liu G, Parton RG, Huang X, Coleman RA, Yang H. 2016. SEIPIN regulates lipid droplet expansion and adipocyte development by modulating the activity of glycerol-3-phosphate acyltransferase. *Cell Reports* **217**:1546-1559. doi: 10.1016/j.celrep.2016.10.037

Pol A, Gross SP, Parton RG. 2014. Biogenesis of the multifunctional lipid droplet: lipids,

576 proteins, and sites. *The Journal of Cell Biology* **204**:635-646. doi:  
577 10.1083/jcb.201311051

578 Poppelreuther M, Rudolph B, Du C, Großmann R, Becker M, Thiele C, Ehehalt R, Füllekrug  
579 J. 2012. The N-terminal region of acyl-CoA synthetase 3 is essential for both the  
580 localization on lipid droplets and the function in fatty acid uptake. *The Journal of*  
581 *Lipid Research* **53**:888-900. doi: 10.1194/jlr.M024562

582 Rambold AS, Cohen S, Lippincott-Schwartz J. 2015. Fatty acid trafficking in starved cells:  
583 regulation by lipid droplet lipolysis, autophagy, and mitochondrial fusion dynamics.  
584 *Developmental Cell* **32**:678-692. doi: 10.1016/j.devcel.2015.01.029

585 Rusiñol AE, Cui Z, Chen MH, Vance JE. 1994. A unique mitochondria-associated membrane  
586 fraction from rat liver has a high capacity for lipid synthesis and contains pre-Golgi  
587 secretory proteins including nascent lipoproteins. *The Journal of Biological*  
588 *Chemistry* **269**:27494-27502.

589 Salaün C, Gould GW, Chamberlain LH. 2005. The SNARE proteins SNAP-25 and  
590 SNAP-23 display different affinities for lipid rafts in PC12 cells. Regulation by  
591 distinct cysteine-rich domains. *The Journal of Biological Chemistry* **280**:1236-1240.

592 Salaun C, Greaves J, Chamberlain LH. 2010. The intracellular dynamic of protein  
593 palmitoylation. *The Journal of Cell Biology* **91**:1229-1238. doi:  
594 10.1083/jcb.201008160.

595 Salo VT, Belevich I, Li S, Karhinen L, Vihinen H, Vigouroux C, Magré J, Thiele C,  
596 Hölttä-Vuori M, Jokitalo E, Ikonen E. 2016. Seipin regulates ER-lipid droplet  
597 contacts and cargo delivery. *The EMBO Journal* **35**:2699-2716.

598 Sano R, Annunziata I, Patterson A, Moshiah S, Gomero E, Opferman J, Forte M, d'Azzo A.  
599 2009. GM1-ganglioside accumulation at the mitochondria-associated ER membranes  
600 links ER stress to Ca<sup>2+</sup>-dependent mitochondrial apoptosis. *Molecular Cell*

601           **36**:500-511. doi: 10.1016/j.molcel.2009.10.021

602   Shindou H, Shimizu T. 2009. Acyl-CoA:lysophospholipid acyltransferases. *The Journal of*  
603           *Biological Chemistry* **284**:1-5. doi: 10.1074/jbc.R800046200

604   Simmen T, Aslan JE, Blagoveshchenskaya AD, Thomas L, Wan L, Xiang Y, Feliciangeli SF,  
605           Hung CH, Crump CM, Thomas G. 2005. PACS-2 controls endoplasmic  
606           reticulum-mitochondria communication and Bid-mediated apoptosis. *The EMBO*  
607           *Journal* **24**:717-729.

608   Somwar R, Roberts CT Jr, Varlamov O. 2011. Live-cell imaging demonstrates rapid cargo  
609           exchange between lipid droplets in adipocytes. *FEBS Letters* **585**:1946-1950. doi:  
610           10.1016/j.febslet.2011.05.016.

611   Soupene E, Dinh NP, Siliakus M, Kuypers FA. 2010. Activity of the acyl-CoA synthetase  
612           ACSL6 isoforms: role of the fatty acid Gate-domains. *BMC Biochemistry* **11**:18. doi:  
613           10.1186/1471-2091-11-18

614   Steegmaier M, Oorschot V, Klumperman J, Scheller RH. 2000. Syntaxin 17 is abundant in  
615           steroidogenic cells and implicated in smooth endoplasmic reticulum membrane  
616           dynamics. *Molecular Biology of the Cell* **11**:2719-2731.

617   Stone SJ, Levin MC, Zhou P, Han J, Walther TC, Farese RV Jr. 2009. The endoplasmic  
618           reticulum enzyme DGAT2 is found in mitochondria-associated membranes and has a  
619           mitochondrial targeting signal that promotes its association with mitochondria. *The*  
620           *Journal of Biological Chemistry* **284**:5352-5361. doi: 10.1074/jbc.M80576820

621   Stordeur C, Puth K, Sáenz JP, Ernst R. 2014. Crosstalk of lipid and protein homeostasis to  
622           maintain membrane function. *Biological Chemistry* **395**:313-326. doi:  
623           10.1515/hsz-2013-0235

624   Szymanski KM, Binns D, Bartz R, Grishin NV, Li WP, Agarwal AK, Garg A, Anderson RG,  
625           Goodman JM. 2007. *Proceedings of the National Academy of Sciences of the United*

626 *States of America* **104**:20890-20895.

627 Takáts S, Nagy P, Varga Á, Pircs K, Kárpáti M, Varga K, Kovács AL, Hegedűs K, Juhász G.

628 2013. Autophagosomal Syntaxin17-dependent lysosomal degradation maintains

629 neuronal function in *Drosophila*. *The Journal of Cell Biology* 201:531-539. doi:

630 10.1083/jcb.201211160

631 Thiam AR, Beller M. 2017. The why, when and how of lipid droplet diversity. *Journal of*

632 *Cell Science* **130**:315-324. doi: 10.1242/jcs.192021

633 Thiam AR, Forêt L. 2016. The physics of lipid droplet nucleation, growth and budding.

634 *Biochimica et Biophysica Acta* **1861**:715-722. doi: 10.1016/j.bbalip.2016.04.018

635 Vance JE. 2014, MAM (mitochondria-associated membranes) in mammalian cells: lipids

636 and beyond. *Biochimica et Biophysica Acta* **1841**:595-609. doi:

637 10.1016/j.bbalip.2013.11.014

638 Vogel K, Roche PA. 1999. SNAP-23 and SNAP-25 are palmitoylated *in vivo*. *Biochemical*

639 *and Biophysical Research Communications*. **258**:407-410.

640 Walther TC, Farese RV Jr. 2012. Lipid droplets and cellular lipid metabolism. *Annual Review of*

641 *Biochemistry* **81**:687-714. doi: 10.1146/annurev-biochem-061009-102430

642 Wang CW, Miao YH, Chang YS. 2014. Control of lipid droplet size in budding yeast

643 requires the collaboration between Fld1 and Ldb16. *Journal of Cell Science*

644 **127**:1214-28. doi: 10.1242/jcs.1377

645 Wang H, Becuwe M, Housden BE, Chitraju C, Porras AJ, Graham MM, Liu XN, Thiam

646 AR, Savage DB, Agarwal AK, Garg A, Olarte MJ, Lin Q, Fröhlich F, Hannibal-Bach

647 HK, Upadhyayula S, Perrimon N, Kirchhausen T, Ejsing CS, Walther TC, Farese RV.

648 2016. Seipin is required for converting nascent to mature lipid droplets. *Elife* 5. pii:

649 e16582. doi: 10.7554/eLife.16582

650 Welte MA. 2015. Expanding roles for lipid droplets. *Current Biology* **25**:R470-481. doi:



651           10.1016/j.cub.2015.04.00

652   Wilfling F, Wang H, Haas JT, Krahmer N, Gould TJ, Uchida A, Cheng JX, Graham M,

653           Christiano R, Fröhlich F, Liu X, Buhman KK, Coleman RA, Bewersdorf J, Farese

654           RV Jr, Walther TC. 2013. Triacylglycerol synthesis enzymes mediate lipid droplet

655           growth by relocating from the ER to lipid droplets. *Developmental Cell* **24**:384-399.

656           doi: 10.1016/j.devcel.2013.01.013

657   Zehmer JK., Bartz R, Liu P, Anderson RG. 2008. Identification of a novel N-terminal

658           hydrophobic sequence that targets proteins to lipid droplets. *Journal of Cell Science*

659           **121**:1852–1860. doi: 10.1242/jcs.012013

**Figure 1.** LD formation and TAG synthesis are impaired in Stx17-depleted cells. **(A,D)** HepG2, Huh7, and HeLa cells were mock-transfected or transfected with siRNA Stx17 (440), (194), or (NC) targeting the 3' non-coding region of Stx17, and the protein amounts of Stx17 and  $\alpha$ -tubulin were determined using their antibodies. **(B)** HepG2, Huh7, and HeLa cells were mock-transfected or transfected with siRNA Stx17 (440) or (194). At 72 hr after transfection, cells were fixed and stained with an anti-Stx17 antibody and Lipid Tox. For HeLa cells, OA was added at a final concentration of 150  $\mu$ M at 56 hr after transfection of siRNA, followed by incubation for 16 hr. Bars, 5  $\mu$ m. **(C)** HeLa cells were mock-transfected or transfected with siRNA Stx17 (440) or (194), treated with OA for the indicated times, and lysed, and then the amount of TAG was determined using an adipogenesis colorimetric/fluorometric assay kit. As a negative control, mock-treated HeLa cells were incubated with OA in the presence of 10  $\mu$ M Triacsin C for 16 hr, and then the amount of TAG was determined. The bar graph shows the means  $\pm$  SD (n = 3). **(E,F)** HeLa cells or HeLa cells expressing the indicated FLAG-tagged constructs were transfected with siRNA Stx17 (NC), treated with OA for 16 hr, fixed, and then immunostained with an anti-FLAG antibody and Lipid Tox. The graphs show the average number **(E)** and size **(F)** of LDs under each condition. Values are the means  $\pm$  SD (n = 3).

**Figure 1-source data 1.** Values, statistics, and exact p values for Figure 1C,E,F.

**Figure 1-figure supplement 1.** Silencing of Stx17 suppresses differentiation of 3T3-L1 preadipocytes. **(A)** 3T3-L1 cells were mock-transfected or transfected with siRNA targeting mouse Stx17 (siRNA (421)), and then differentiation was induced with an AdipoInducer Reagent. Protein expression levels were determined by immunoblotting using the indicated antibodies. The graph at the bottom shows the intensity of the Stx17 protein band relative to

685 that of  $\alpha$ -tubulin. D.I. (-) denotes no differentiation induction. The bar graph shows the  
 686 means  $\pm$  SD (n = 3). (B) Oil Red O staining of 3T3-L1 cells during differentiation. Bars, 5  
 687  $\mu$ m. (C) Quantitation of Oil Red O staining. The bar graph shows the means  $\pm$  SD (n = 3).  
 688 (D) Distribution and schematic representation of Stx17 wild-type and its derivatives.

690 **Figure 1-source data 2.** Values, statistics, and exact p values for Figure 1-figure supplement  
 691 1A,C.

692  
 693 **Figure 2.** Aberrant distribution of ACSL3 on LDs in Stx17-silenced cells. (A) HeLa cells  
 694 were mock-transfected or transfected with siRNA Stx17 (440), treated with OA for 16 hr,  
 695 fixed, and then stained with Lipid Tox and an antibody against ACSL3 or Tip47. Bars in  
 696 normal images, 5  $\mu$ m, and in enlarged images, 1  $\mu$ m. (B) Enlarged images of (A). Bars, 1  $\mu$ m.  
 697 (C) Quantitation of the data in (B). The fluorescence intensities of calnexin (CNX), ACSL3,  
 698 and Tip47 surrounding LDs relative to that of Lipid Tox were plotted. The bar graph shows  
 699 the means  $\pm$  SEM (n = 3). (D) Electron micrographs of mock-treated HeLa cells (upper row)  
 700 and Stx17-silenced cells (lower row) after 16 hr OA treatment. Bars, 200 nm. (E)  
 701 Quantitation of the data in (D). The ratio of the area of ER-LD contact sites relative to the  
 702 circumference of the LD surface was plotted. The bar graph shows the means  $\pm$  SD (n = 5).  
 703 More than 30 LDs were analyzed in each experiment. (F) Mock-treated or Stx17-silenced  
 704 cells were transfected with one of the indicated plasmids or treated with BODIPY FL-C16 to  
 705 visualize the surface or luminal domain of LDs. FRAP experiments were performed as  
 706 described under Materials and methods. The graphs show the relative signal intensity after  
 707 photobleaching. Values are the means  $\pm$  SD (n = 3). The raw data are shown in *Figure*  
 708 *2-figure supplement 1*.

710 **Figure 2-source data 1.** Values, statistics, and exact p values for Figure 2C,E,F.

711

712 **Figure 2-figure supplement 1.** LDs are close to the ER in Stx17-silenced cells. The images  
713 in FRAP experiments. (A) Mock-treated cells and (B) Stx17-silenced cells. Bars, 5  $\mu$ m.

714

715 **Figure 3.** The SNARE domain of Stx17 and GATE domain of ACSL3 are indispensable for  
716 the interaction between Stx17 and ACSL3. (A,B,E) HeLa cells were transfected with the  
717 indicated constructs. At 24 hr after transfection, cell lysates were prepared and  
718 immunoprecipitated using anti-FLAG M2 beads. 5% input and the precipitated proteins were  
719 analyzed with the indicated antibodies. (C) HeLa cells were transfected with one of the  
720 indicated FLAG-Stx17 constructs and then incubated for 24 hr. Cells were incubated in the  
721 presence (dark gray bar) or absence (white bar) of OA for 16 hr and fixed, and PLA was  
722 performed using antibodies against FLAG and ACSL3. The bar graph shows the means  $\pm$   
723 SEM (n = 3). The PLA images are shown in *Figure 3-figure supplement 1A*. (D) Schematic  
724 representation of ACSL3 and its deletion mutants. (F) HeLa cells stably expressing Stx17  
725 wild-type or the K254C mutant were transfected with GFP-ACSL3 wild-type (dark gray bar),  
726 the  $\Delta$ GATE mutant (light gray bar), or the  $\Delta$ TMD mutant (white bar), and treated as  
727 described in (C). PLA was performed using antibodies against FLAG and GFP. The bar  
728 graph shows the means  $\pm$  SEM (n = 3).

729

730 **Figure 3-source data 1.** Values, statistics, and exact p values for Figure 3C,F.

731

732 **Figure 3-figure supplement 1.** Localization of ACSL3 and LD-related proteins. (A) The  
733 PLA images related to *Figure 3C*. The fluorescence dots represent the proximity between  
734 Stx17 constructs and ACSL3. Bars, 5  $\mu$ m. (B) HeLa cells were transfected with one of the

735 indicated GFP-ACSL3 constructs. At 24 hr after transfection, cells were treated with OA for  
 736 16 hr, fixed, and then stained with Lipid Tox. (C) HeLa cells were transfected with  
 737 FLAG-Stx17 and one of the indicated 3x-HA-tagged constructs. At 24 hr after transfection,  
 738 cell lysates were prepared and immunoprecipitated using anti-FLAG M2 beads. 5% input  
 739 and the precipitated proteins were analyzed with antibodies against HA and FLAG. (D)  
 740 HeLa cells were transfected with GFP-Stx17 and one of the indicated FLAG-tagged  
 741 constructs. At 24 hr after transfection, cell lysates were prepared and immunoprecipitated  
 742 using an anti-GFP antibody. 5% input and the precipitated proteins were analyzed with  
 743 antibodies against GFP and FLAG. (E) HeLa cells were mock-transfected or transfected with  
 744 siRNA Stx17 (440). After 48 hr, cells were transfected with one of the indicated 3x-HA- or  
 745 FLAG-tagged constructs, and incubated for 24 hr, and then OA was added. After 16 hr, cells  
 746 were fixed and stained with Lipid Tox and an antibody against HA or FLAG. The staining  
 747 intensity of HA or FLAG relative to that of Lipid Tox was plotted. Values are the means  $\pm$   
 748 SEM (n = 3).

749

750 **Figure 3-source data 2.** Values, statistics, and exact p values for Figure 3-figure supplement  
 751 1E.

752

753 **Figure 4.** SNAP23 localizes to the MAM. (A) Subcellular fractionation of HeLa cell lysates  
 754 was performed as described under Materials and methods. Equal amounts of proteins in  
 755 individual fractions were subjected by SDS-PAGE and analyzed with the indicated  
 756 antibodies. PNS, postnuclear supernatant; MS, microsomes; Mt, mitochondria. (B) HeLa  
 757 cells were mock-transfected or transfected with siRNA targeting SNAP23, and protein levels  
 758 were determined with antibodies against Stx17 and CNX. (C) Mock-treated and  
 759 SNAP23-depleted cells were treated with OA for 16 hr, and then stained with an anti-

760 ACSL3 antibody and Lipid Tox. Bars, 5  $\mu$ m. (D) Quantitation of the data in (C). The graph  
761 shows the relative ACSL3 staining intensity surrounding LDs. Values are the means  $\pm$  SEM  
762 (n = 3). (E) HeLa cells stably expressing FLAG-Stx17 were mock-transfected or transfected  
763 with siRNA targeting SNAP23. After 72 hr, cells were fixed without treatment (*left*) or  
764 treated with 30  $\mu$ g/ml digitonin for 5 min at room temperature (*right*), and then fixed,  
765 followed by immunostaining with antibodies against FLAG and Tom20 or Sec61 $\beta$ . Bars, 5  
766  $\mu$ m.

767

768 **Figure 4-source data 1.** Values, statistics, and exact a p value for Figure 4D.

769

770 **Figure 5.** Exclusive binding of SNAP23 and ACSL3 to Stx17. (A) HeLa cells were  
771 transfected with one of the indicated FLAG-tagged constructs and then incubated for 24 hr.  
772 Cell lysates were prepared and immunoprecipitated using anti-FLAG M2 beads. 5% input  
773 and the precipitated proteins were analyzed with antibodies against SNAP23 and FLAG. (B)  
774 HeLa cells were transfected with one of the indicated FLAG-tagged constructs and then  
775 incubated for 24 hr. Cells were fixed, and PLA was performed using antibodies against  
776 FLAG and SNAP23. (C,D) HeLa cells were mock-transfected or transfected with siRNA  
777 targeting SNAP23 (C), or transfected with the GFP vector or GFP-SNAP23 wild-type (D).  
778 At 72 hr (siRNA transfection) or 24 hr (plasmid transfection), cells were incubated with OA  
779 for 16 hr. PLA was performed using antibodies against Stx17 and ACSL3. (E) HeLa cells  
780 were mock-transfected or transfected with one of the indicated GFP constructs. At 24 hr after  
781 transfection, cells were incubated with OA for 16 hr. PLA was performed using antibodies  
782 against Stx17 and SNAP23. (B-E) The bar graph shows the means  $\pm$  SEM (n = 3).

783

784 **Figure 5-source data 1.** Values, statistics, and exact p values for Figure 5B-E.

785

786 **Figure 6.** MAM is important for LD formation and the Stx17-ACSL3 interaction. (A) HeLa  
787 cells were mock-transfected or transfected with siRNA targeting PACS-2 or Mfn2. At 72 hr  
788 after transfection, cells were fixed and stained with an anti-Stx17 antibody and Lipid Tox.  
789 Bars, 5  $\mu$ m. (B) Alternatively, PLA was performed using antibodies against Stx17 and  
790 ACSL3. The bar graph shows the means  $\pm$  SEM (n = 3). (C) HeLa cells stably expressing  
791 FLAG-Stx17 were mock-transfected or transfected with siRNA targeting Mfn2 or  
792 PACS-2, treated with DMSO or 30  $\mu$ g/ml digitonin for 5 min at room temperature, fixed, and  
793 then immunostained with an anti-FLAG antibody. Bars, 5  $\mu$ m.

794

795 **Figure 6-source data 1.** Values, statistics, and exact p values for Figure 6B.

796

797 **Figure 7.** Stx17 changes the binding partner from ACSL3 to SNAP23 during LD maturation.  
798 (A) HeLa cells stably expressing FLAG-Stx17 were incubated with OA for the indicated  
799 times. Cell lysates were prepared and immunoprecipitated using anti-FLAG M2 beads. 5%  
800 input and the precipitated proteins were analyzed with the indicated antibodies. The graph on  
801 the right shows the relative band intensity. Values are the means  $\pm$  SD (n = 3). (B) HeLa cells  
802 were treated with OA for the indicated times, and PLA was performed using antibodies  
803 against Stx17 and ACSL3 or SNAP23. The bar graphs show the means  $\pm$  SEM (n = 3). (C)  
804 Working model of the function of Stx17 in LD maturation. For details, see Discussion.

805

806 **Figure 7-source data 1.** Values, statistics, and exact p values for Figure 7A,B.

807



Figure 1

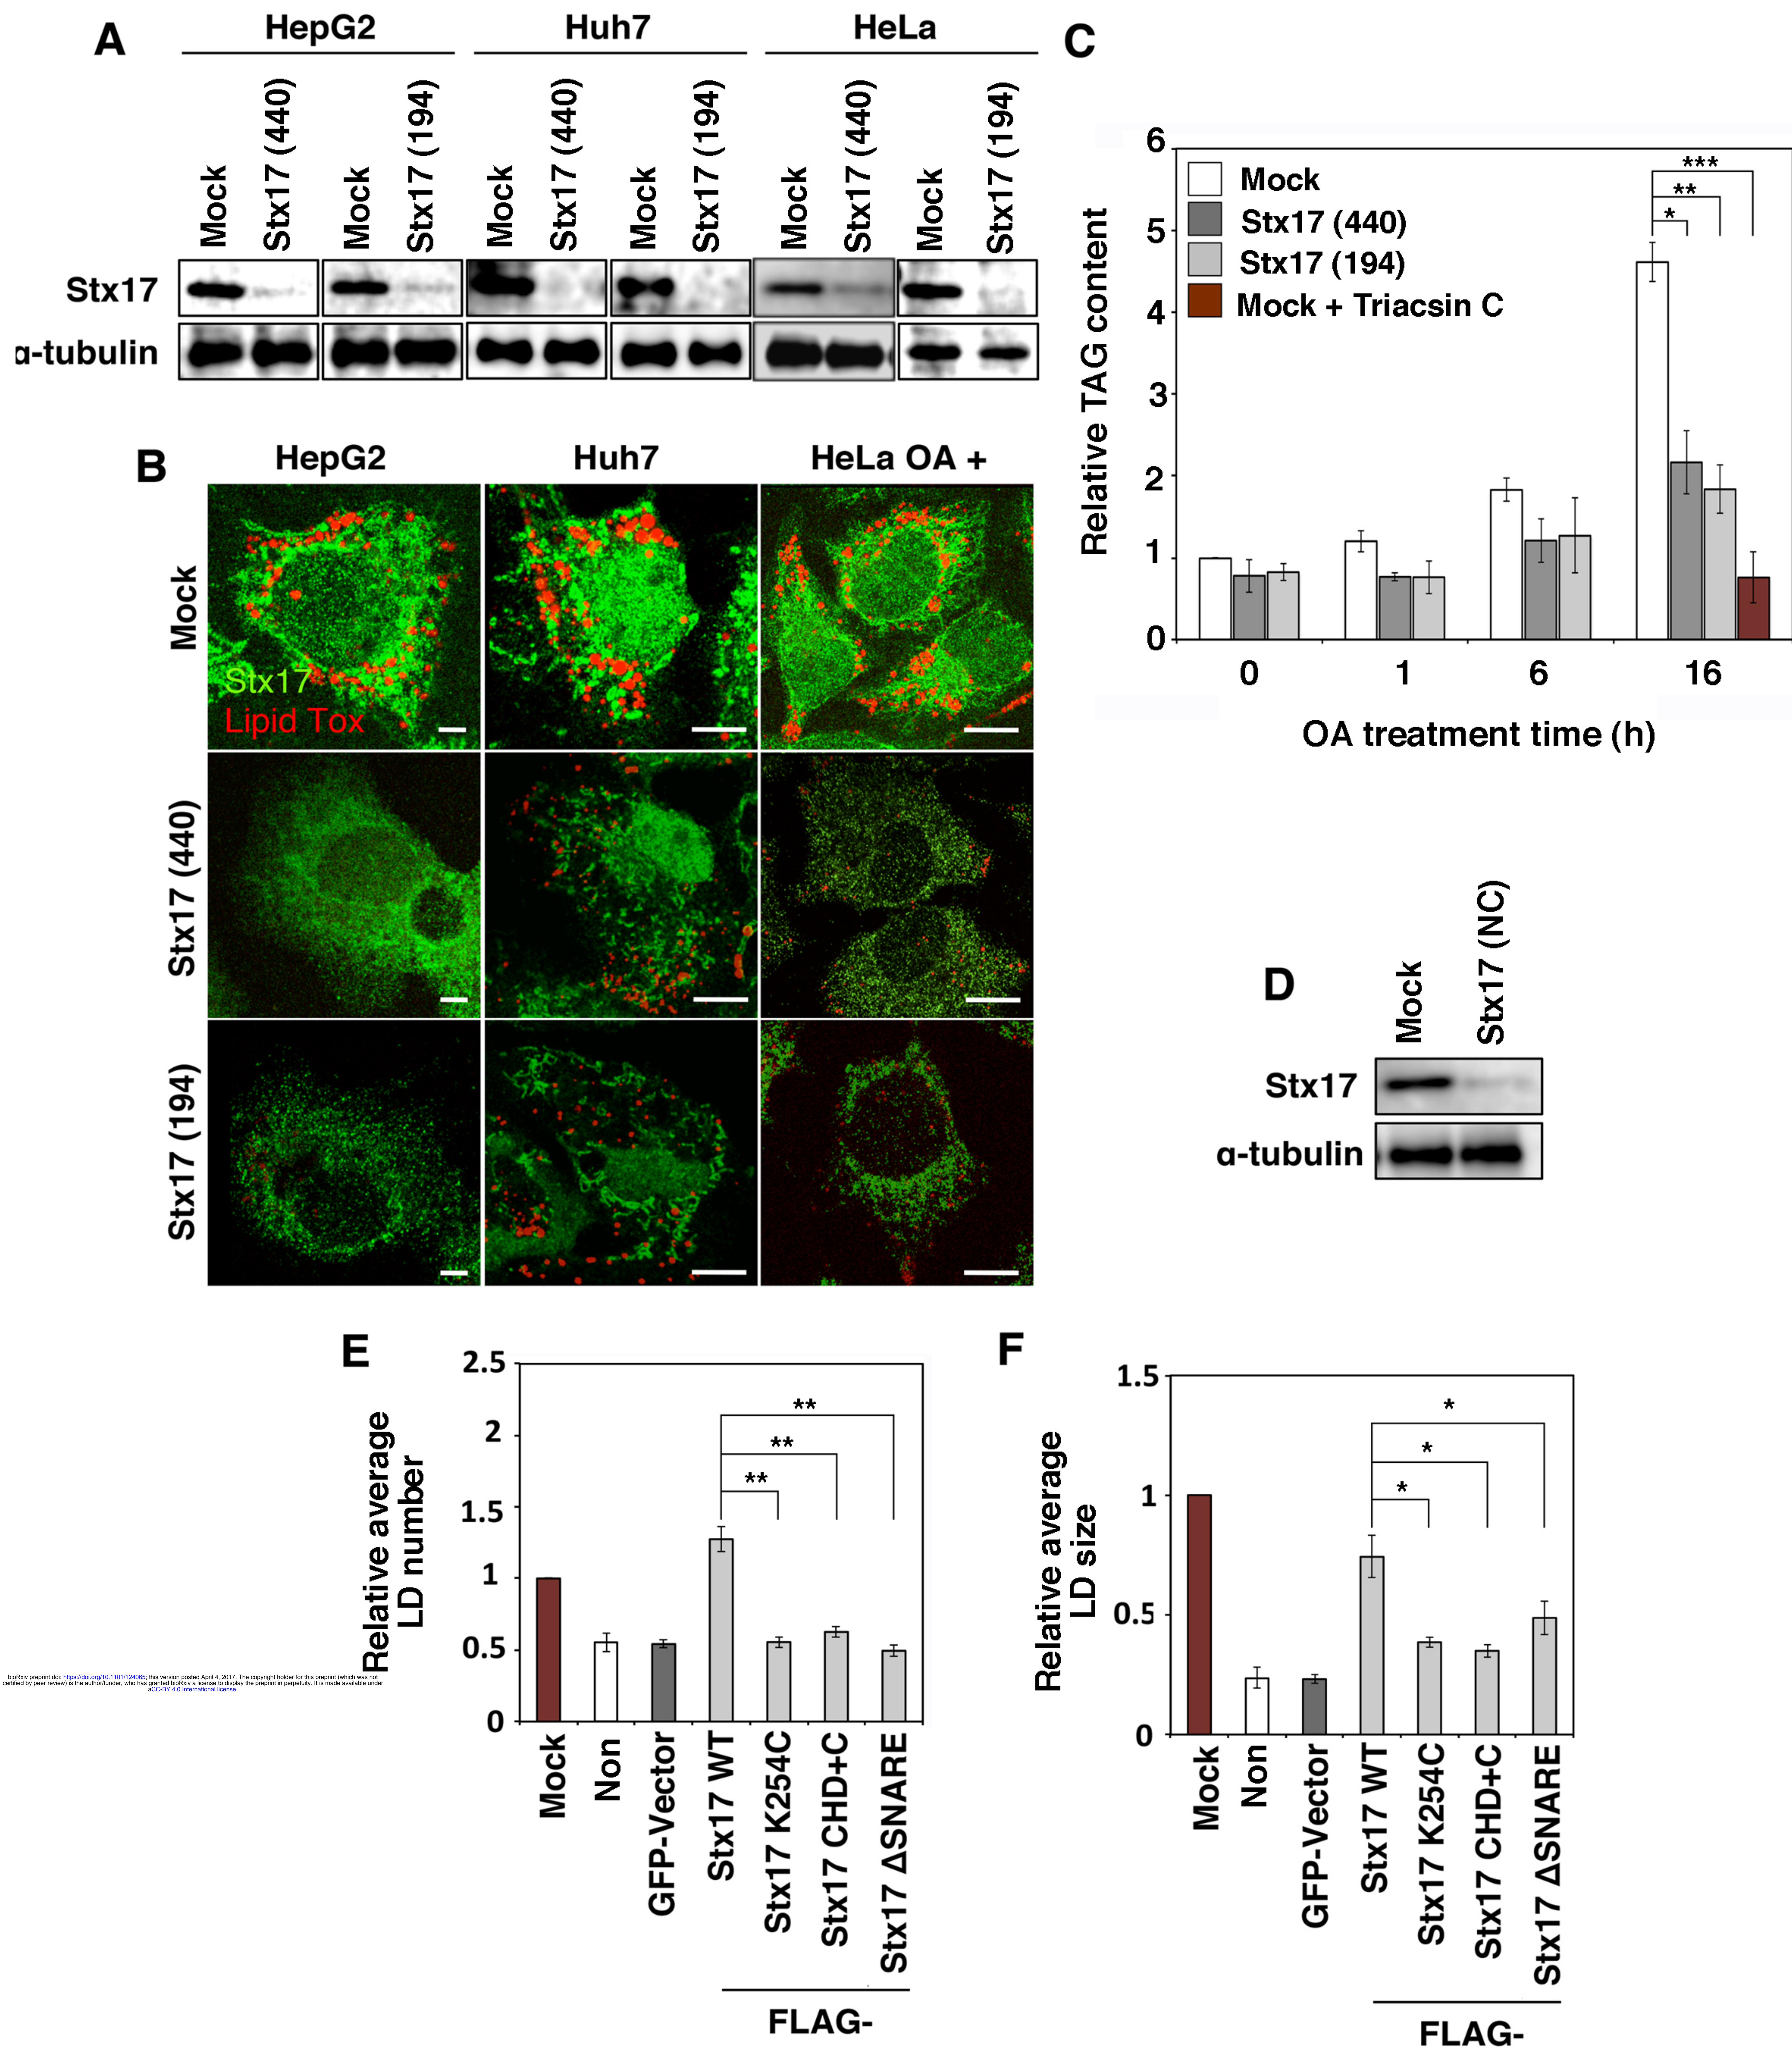



# Figure 1-figure supplement 1

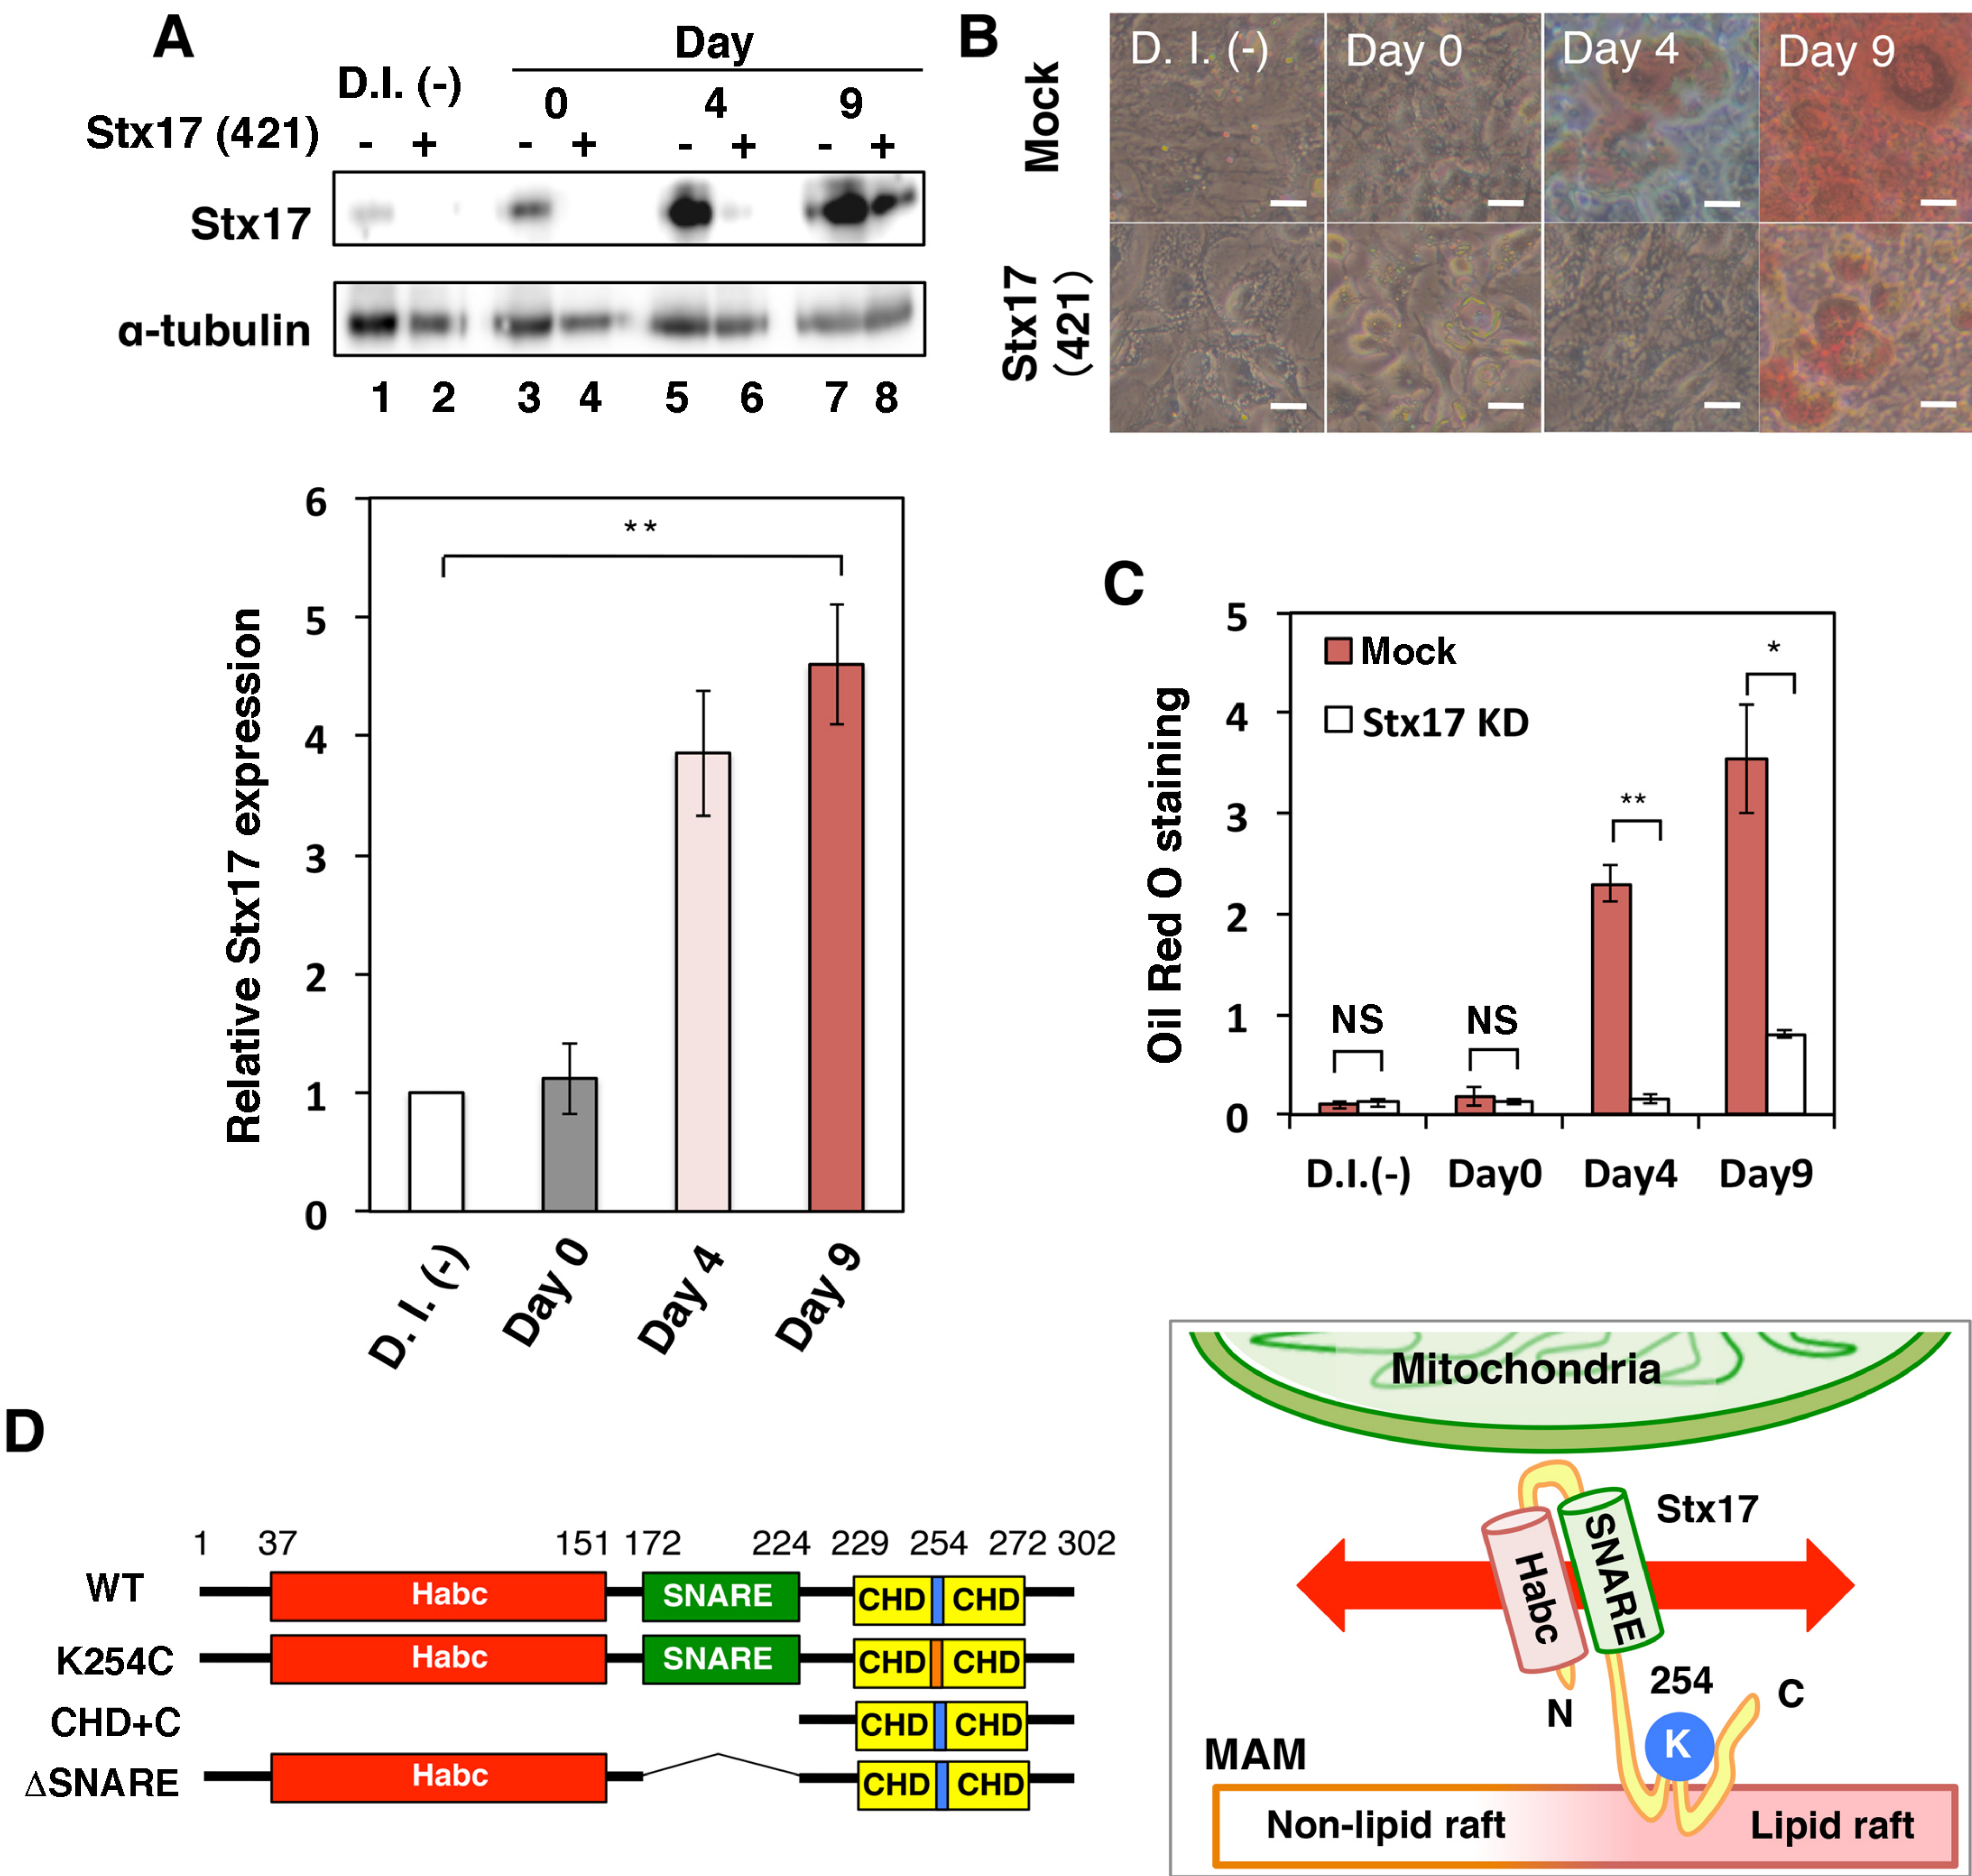



# Figure 2

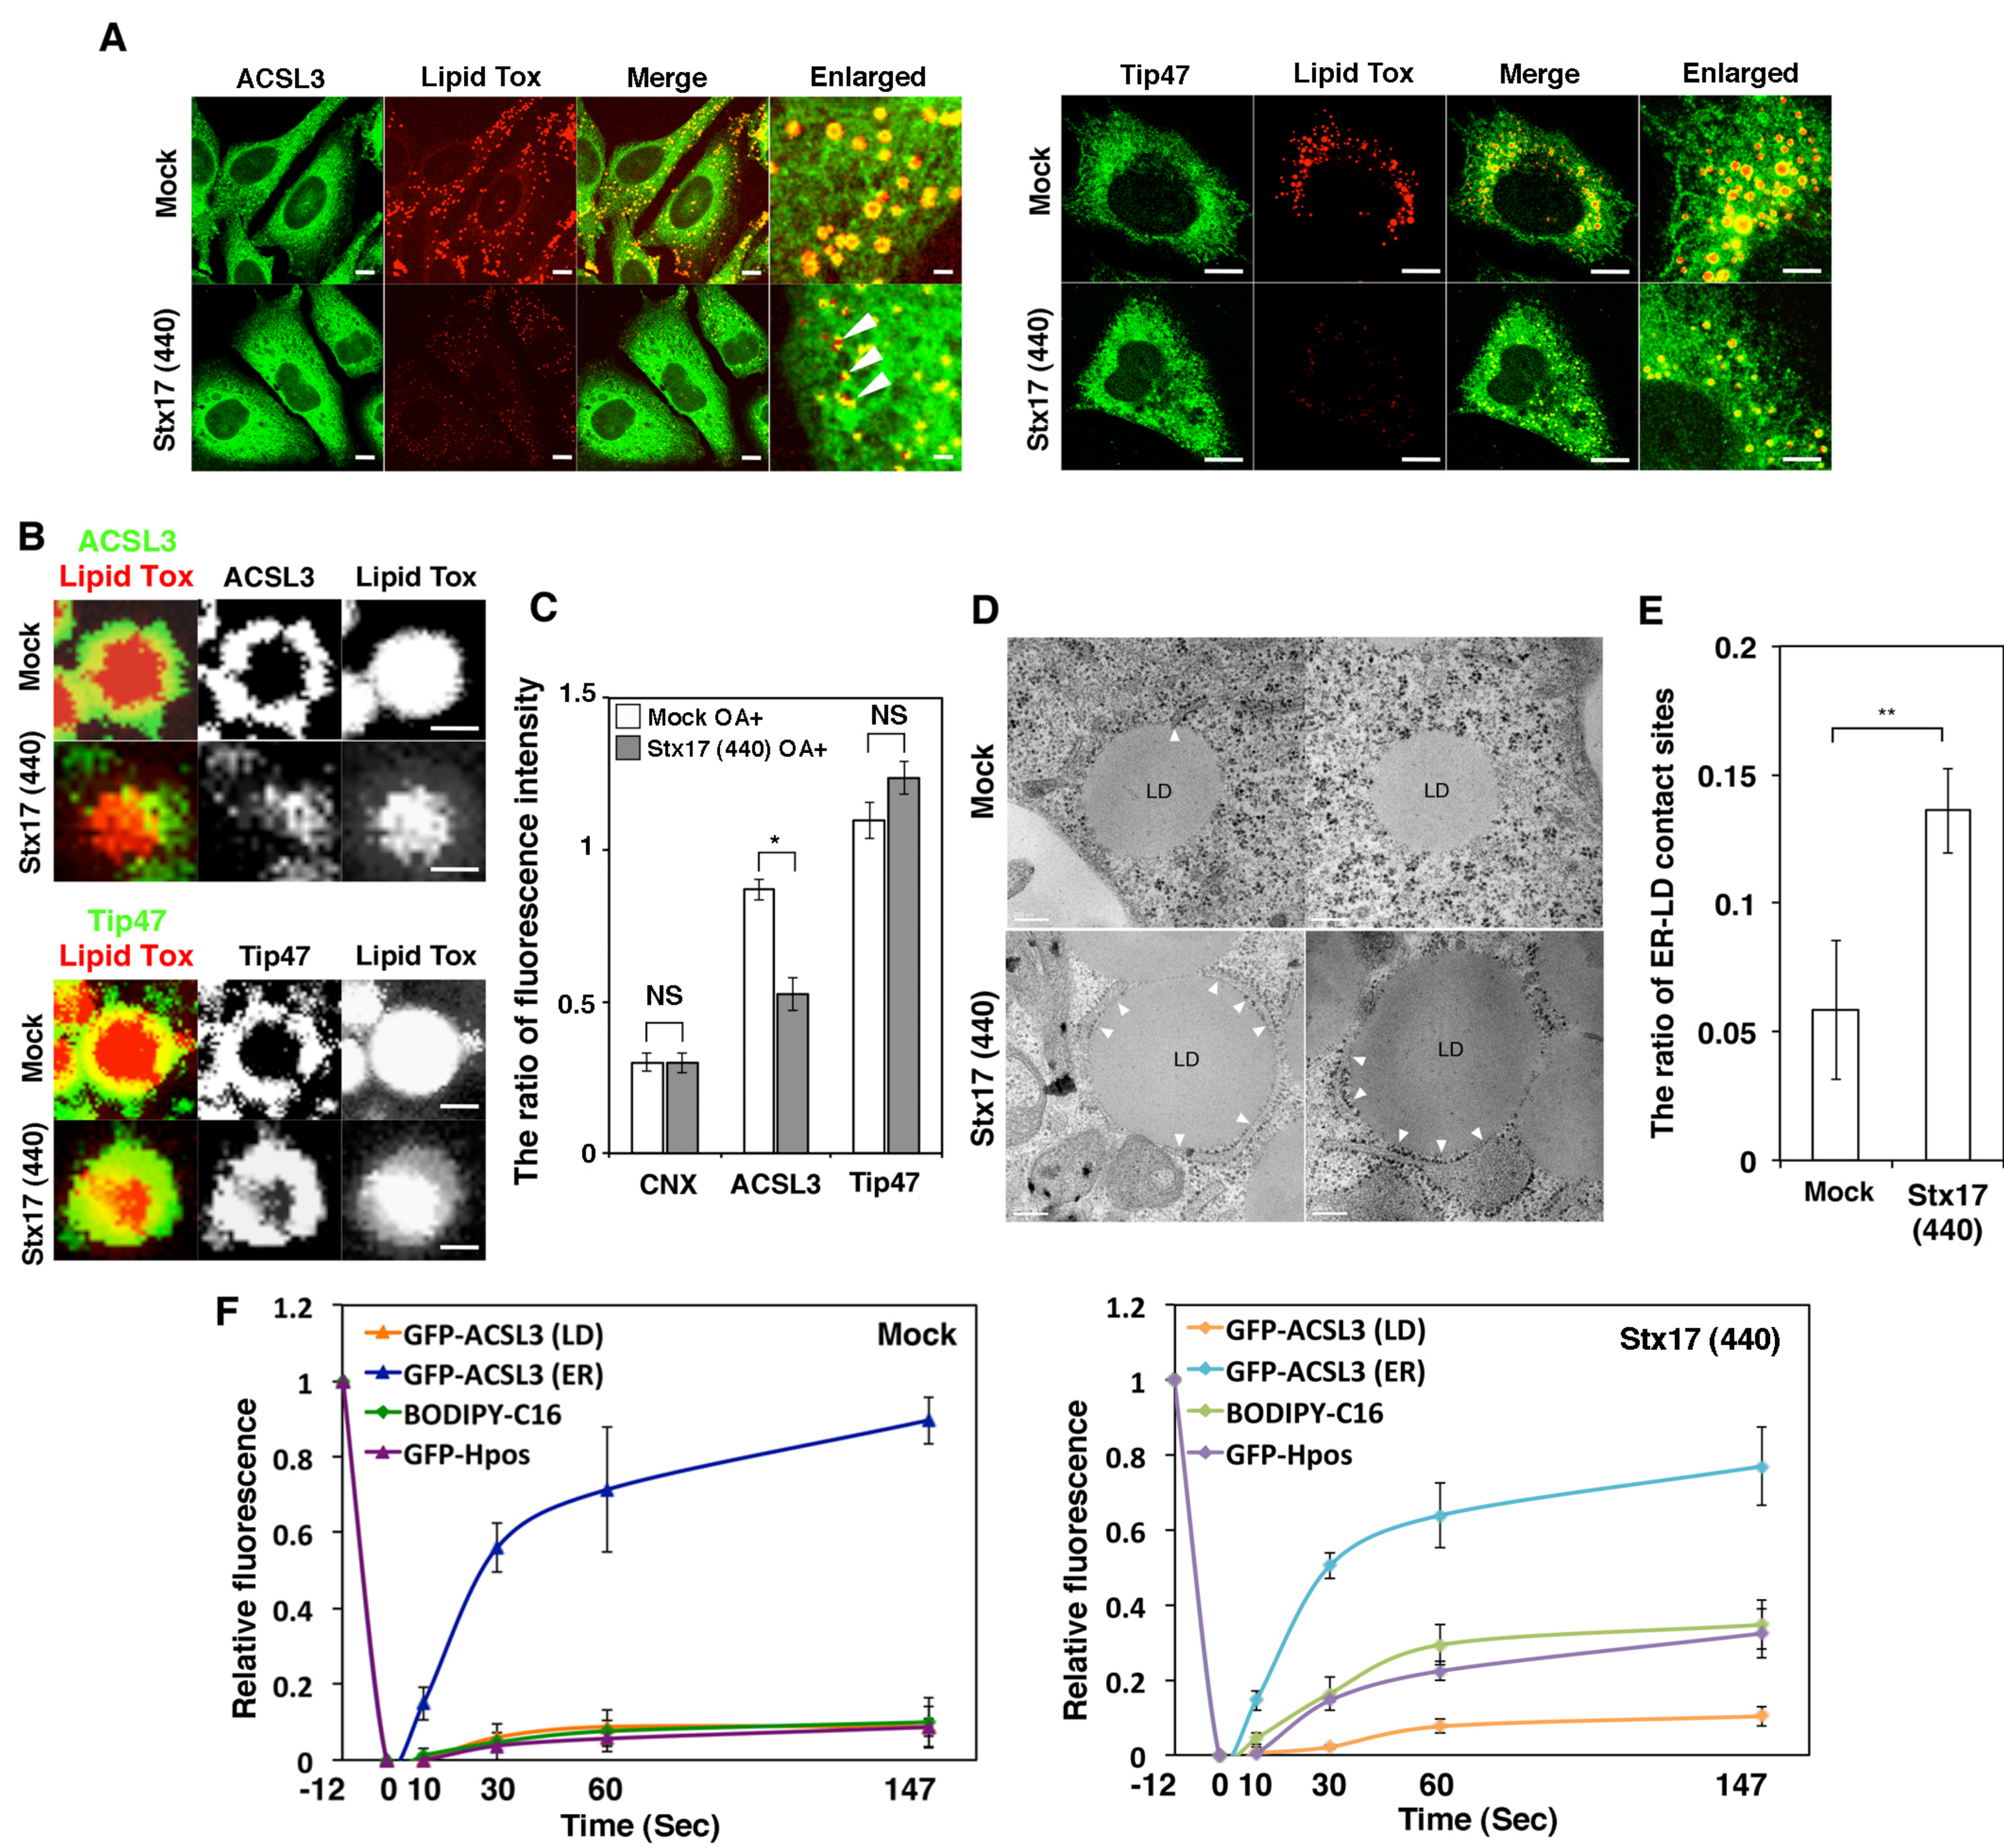



Figure 2 – figure supplement 1

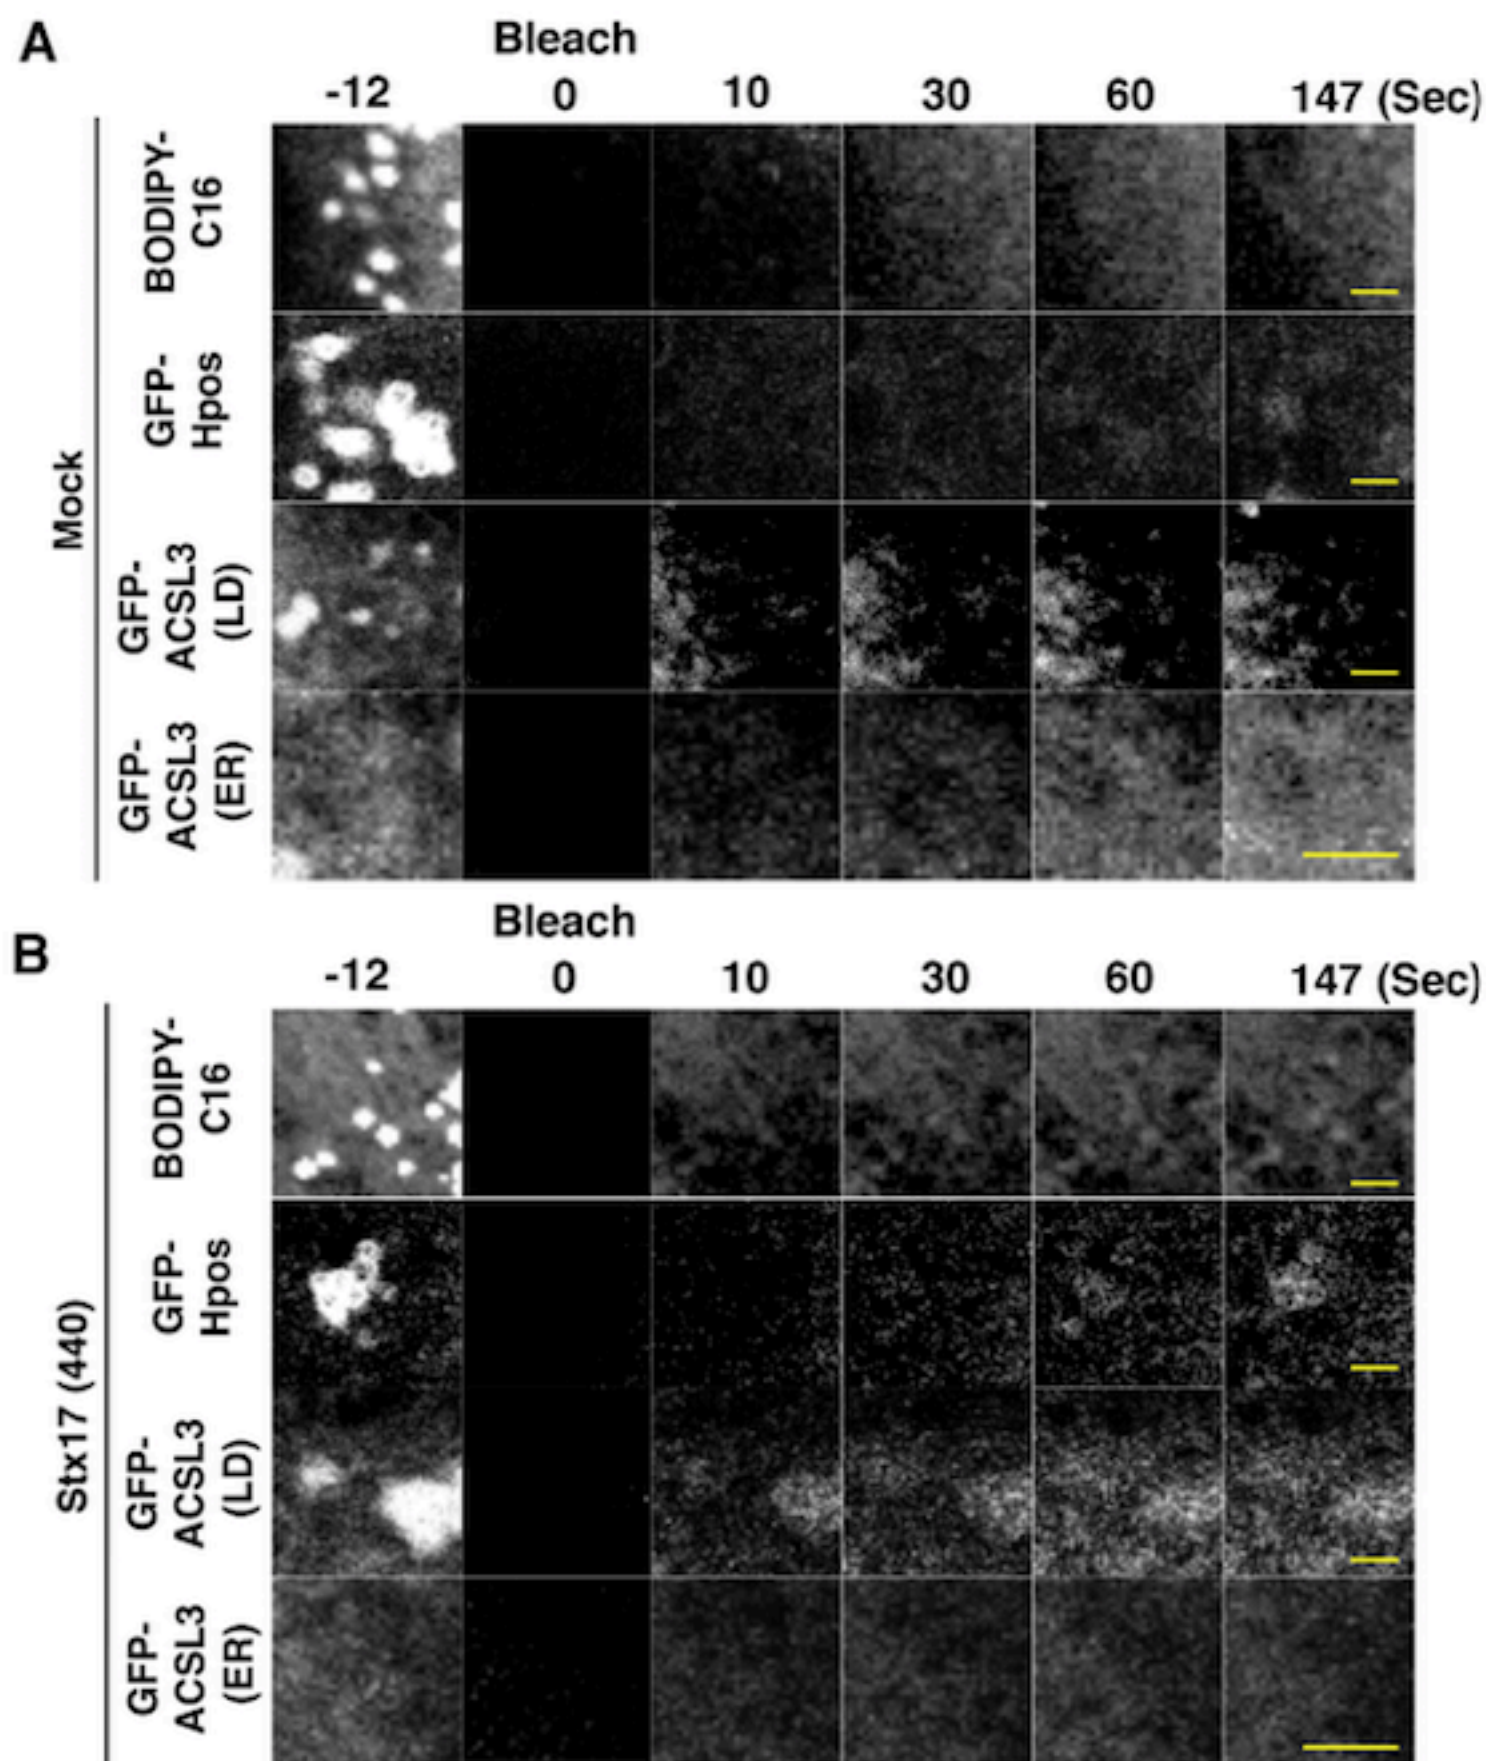

# Figure 3

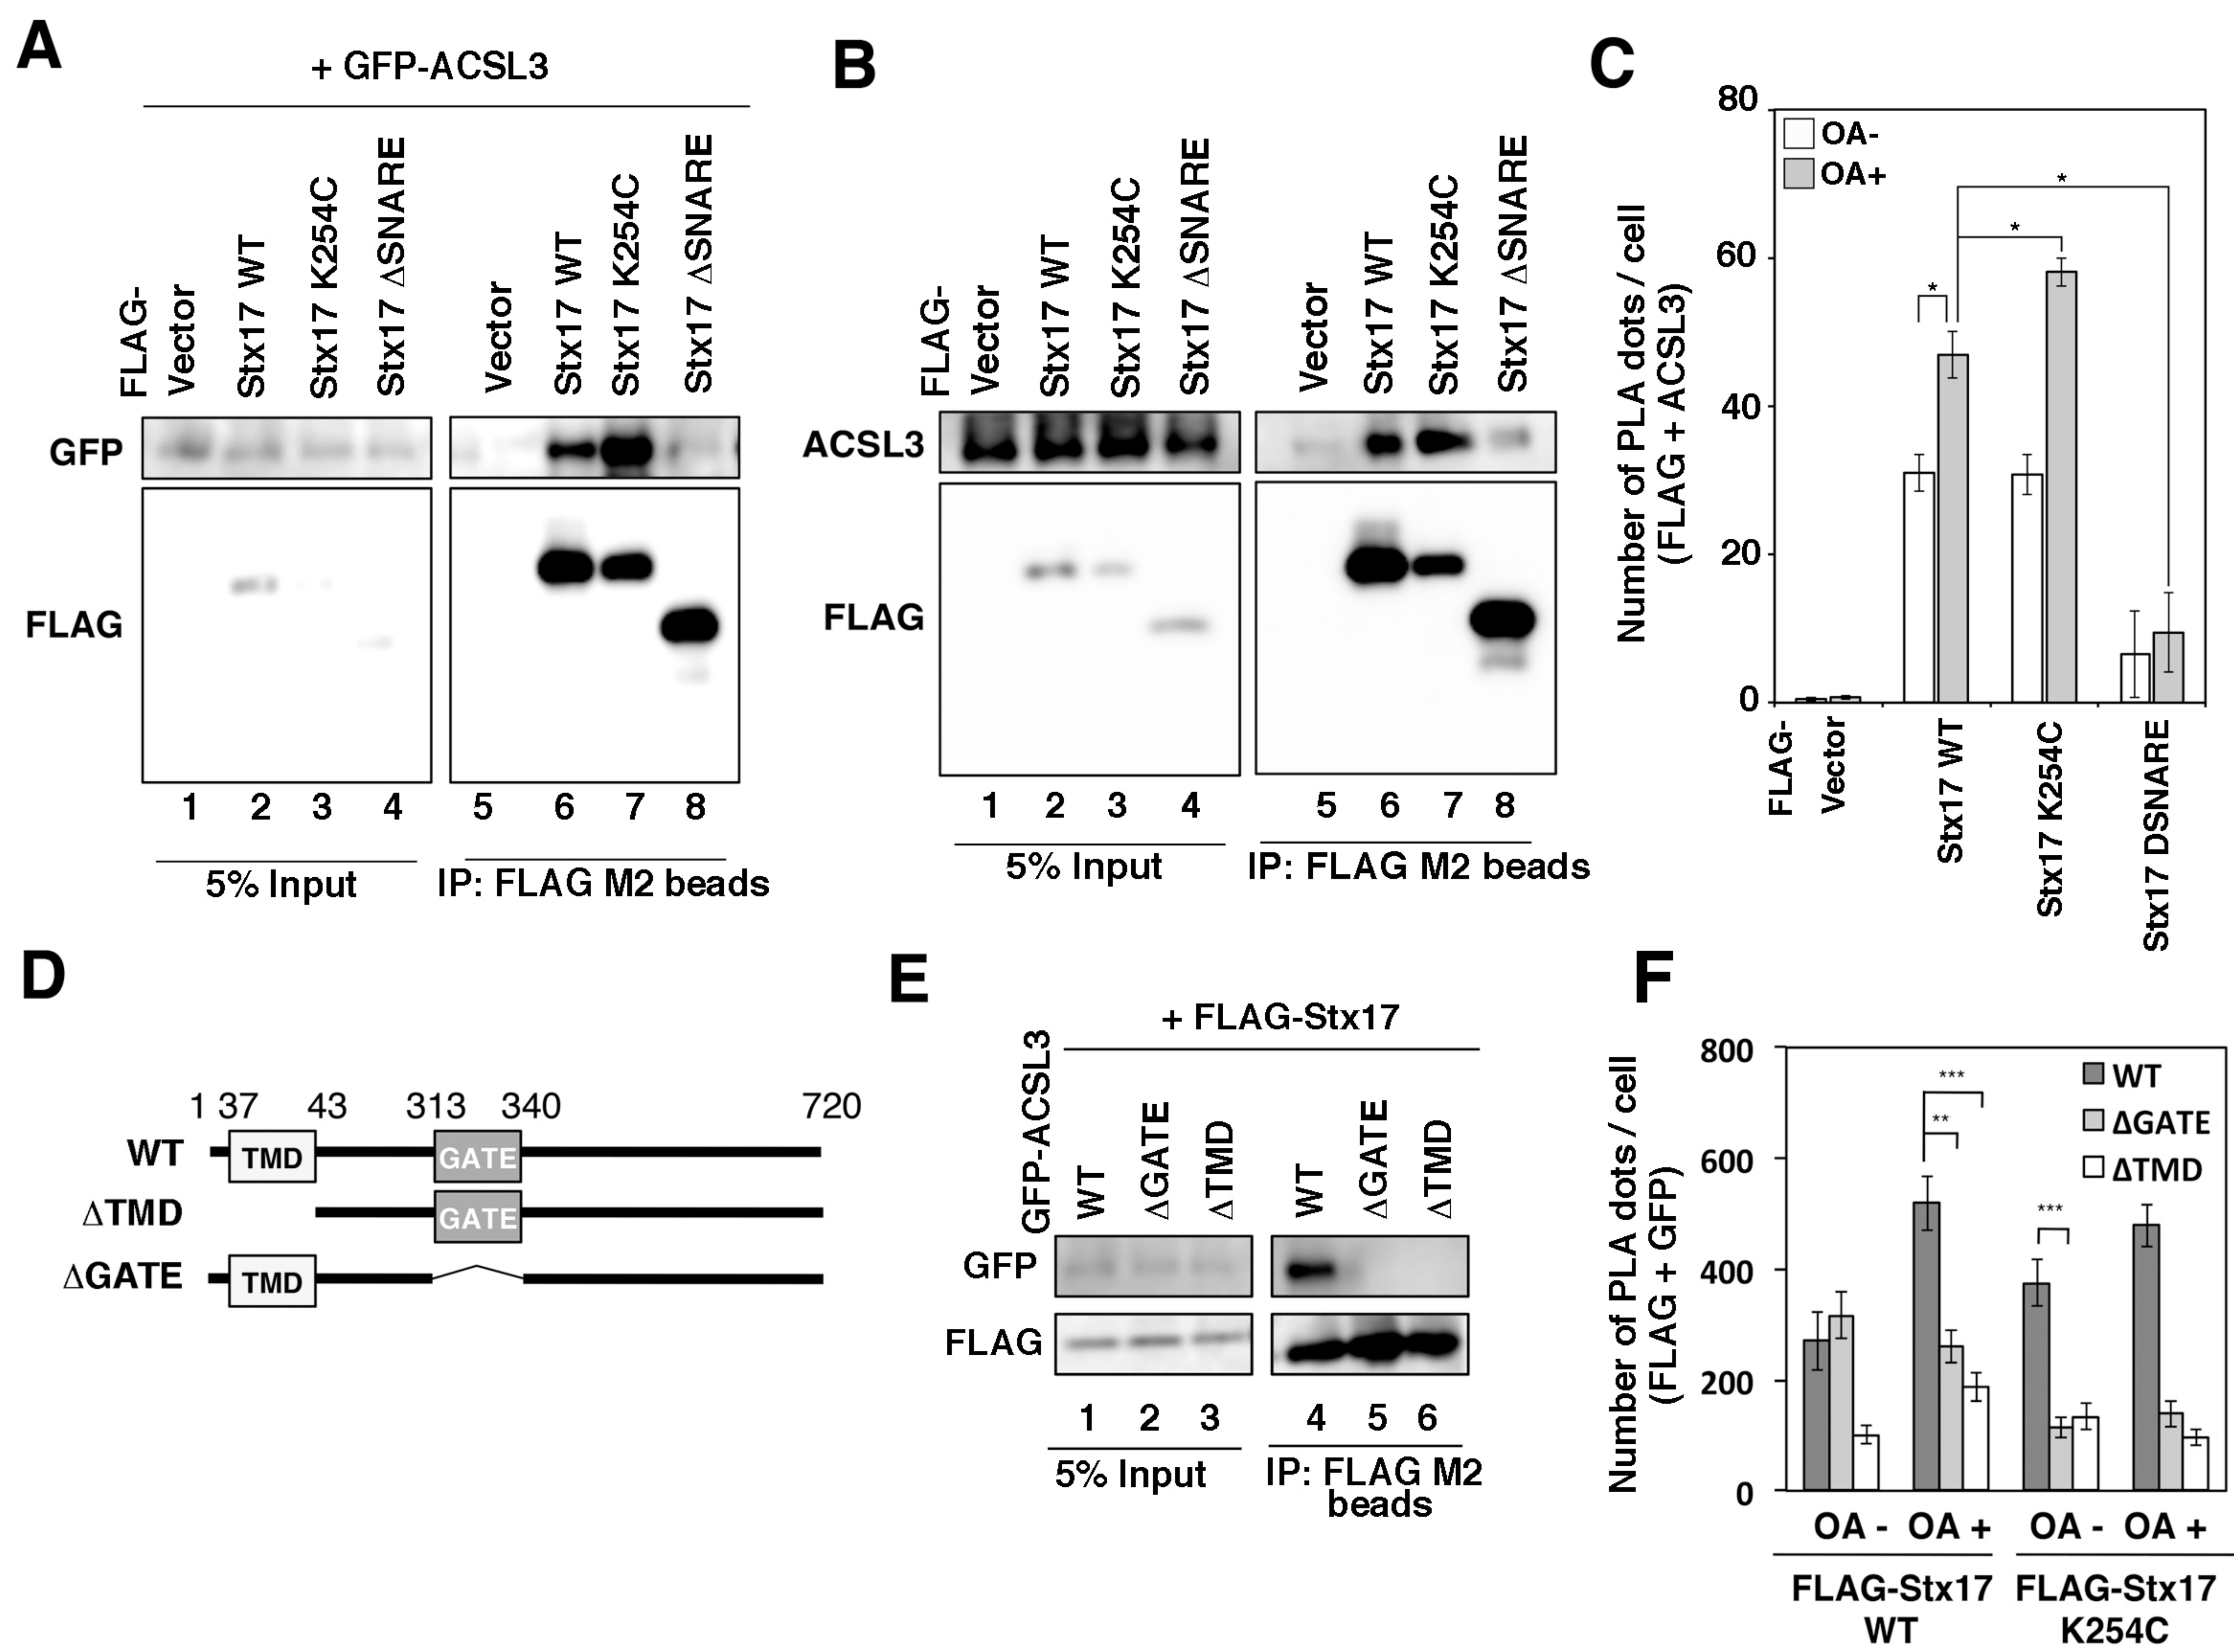

Figure 4

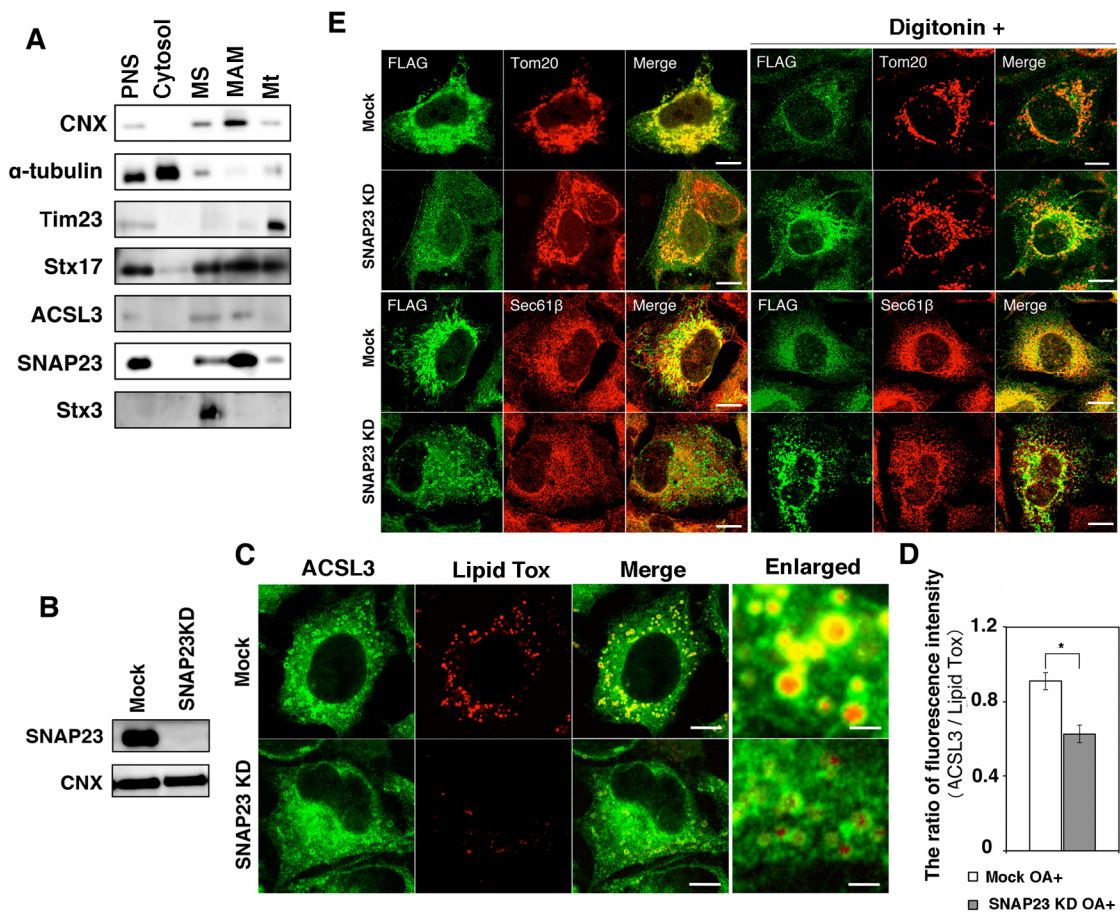



# Figuer 3-figure supplement 1

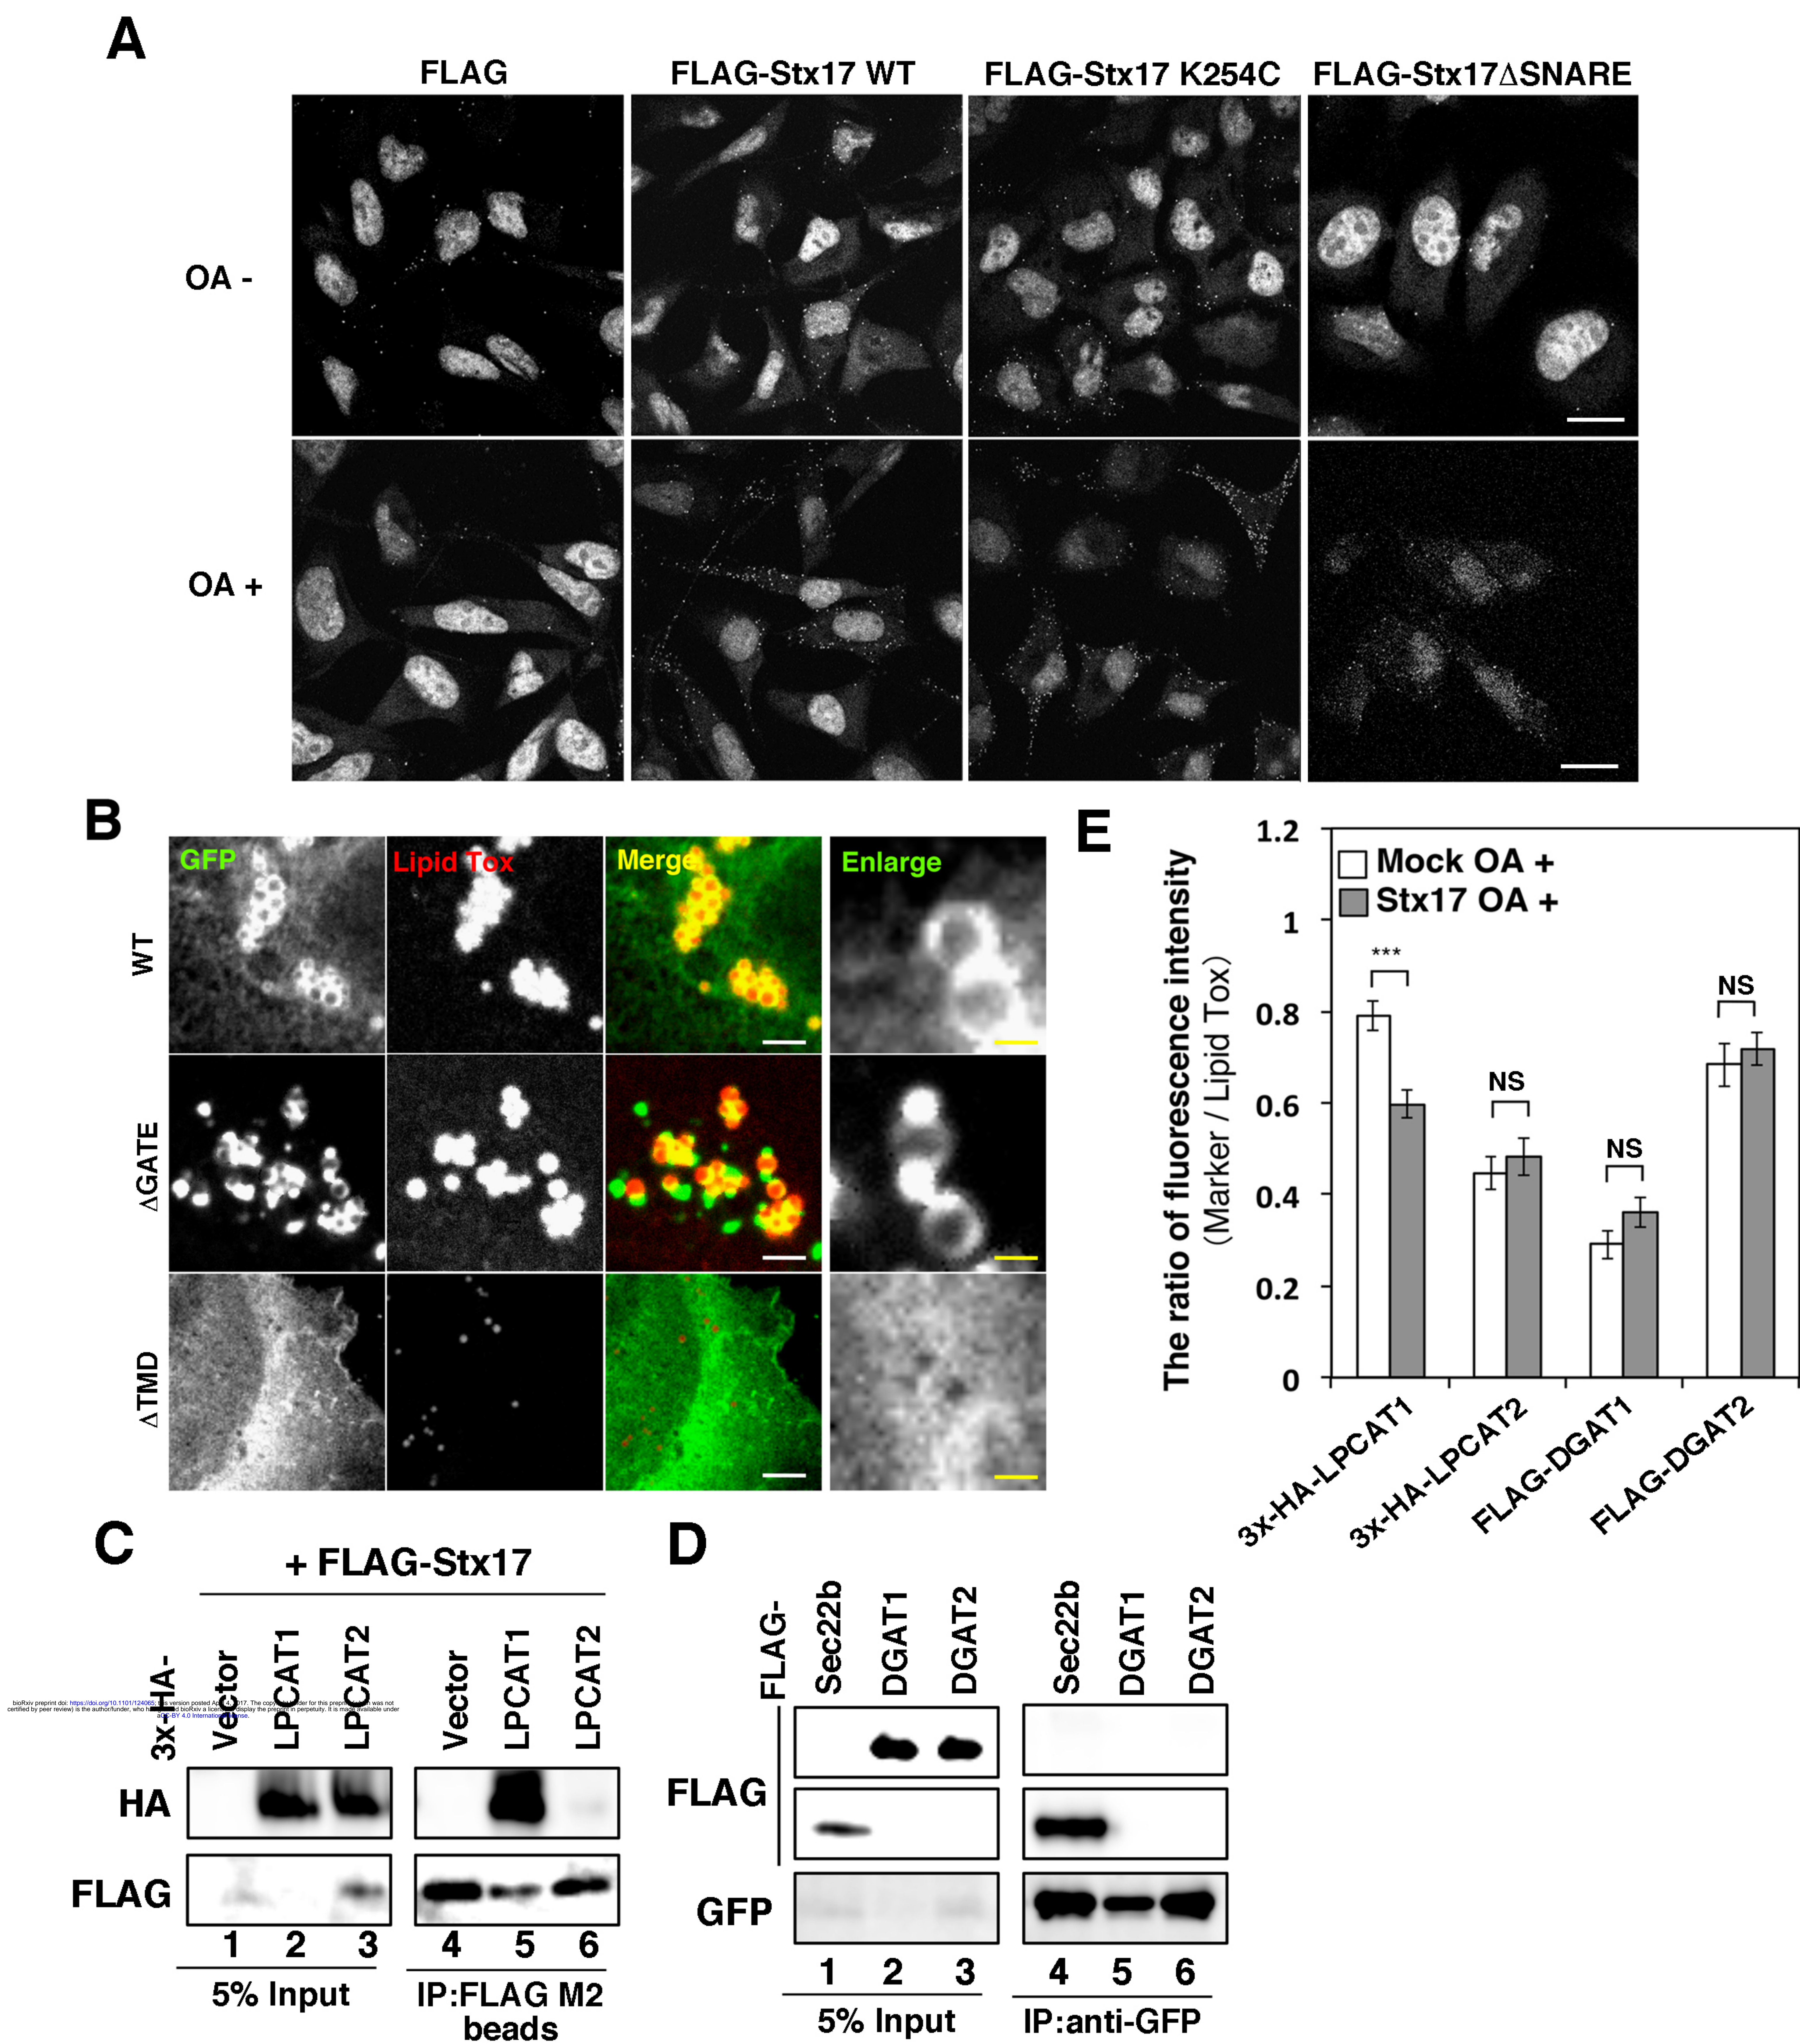



Figure 5

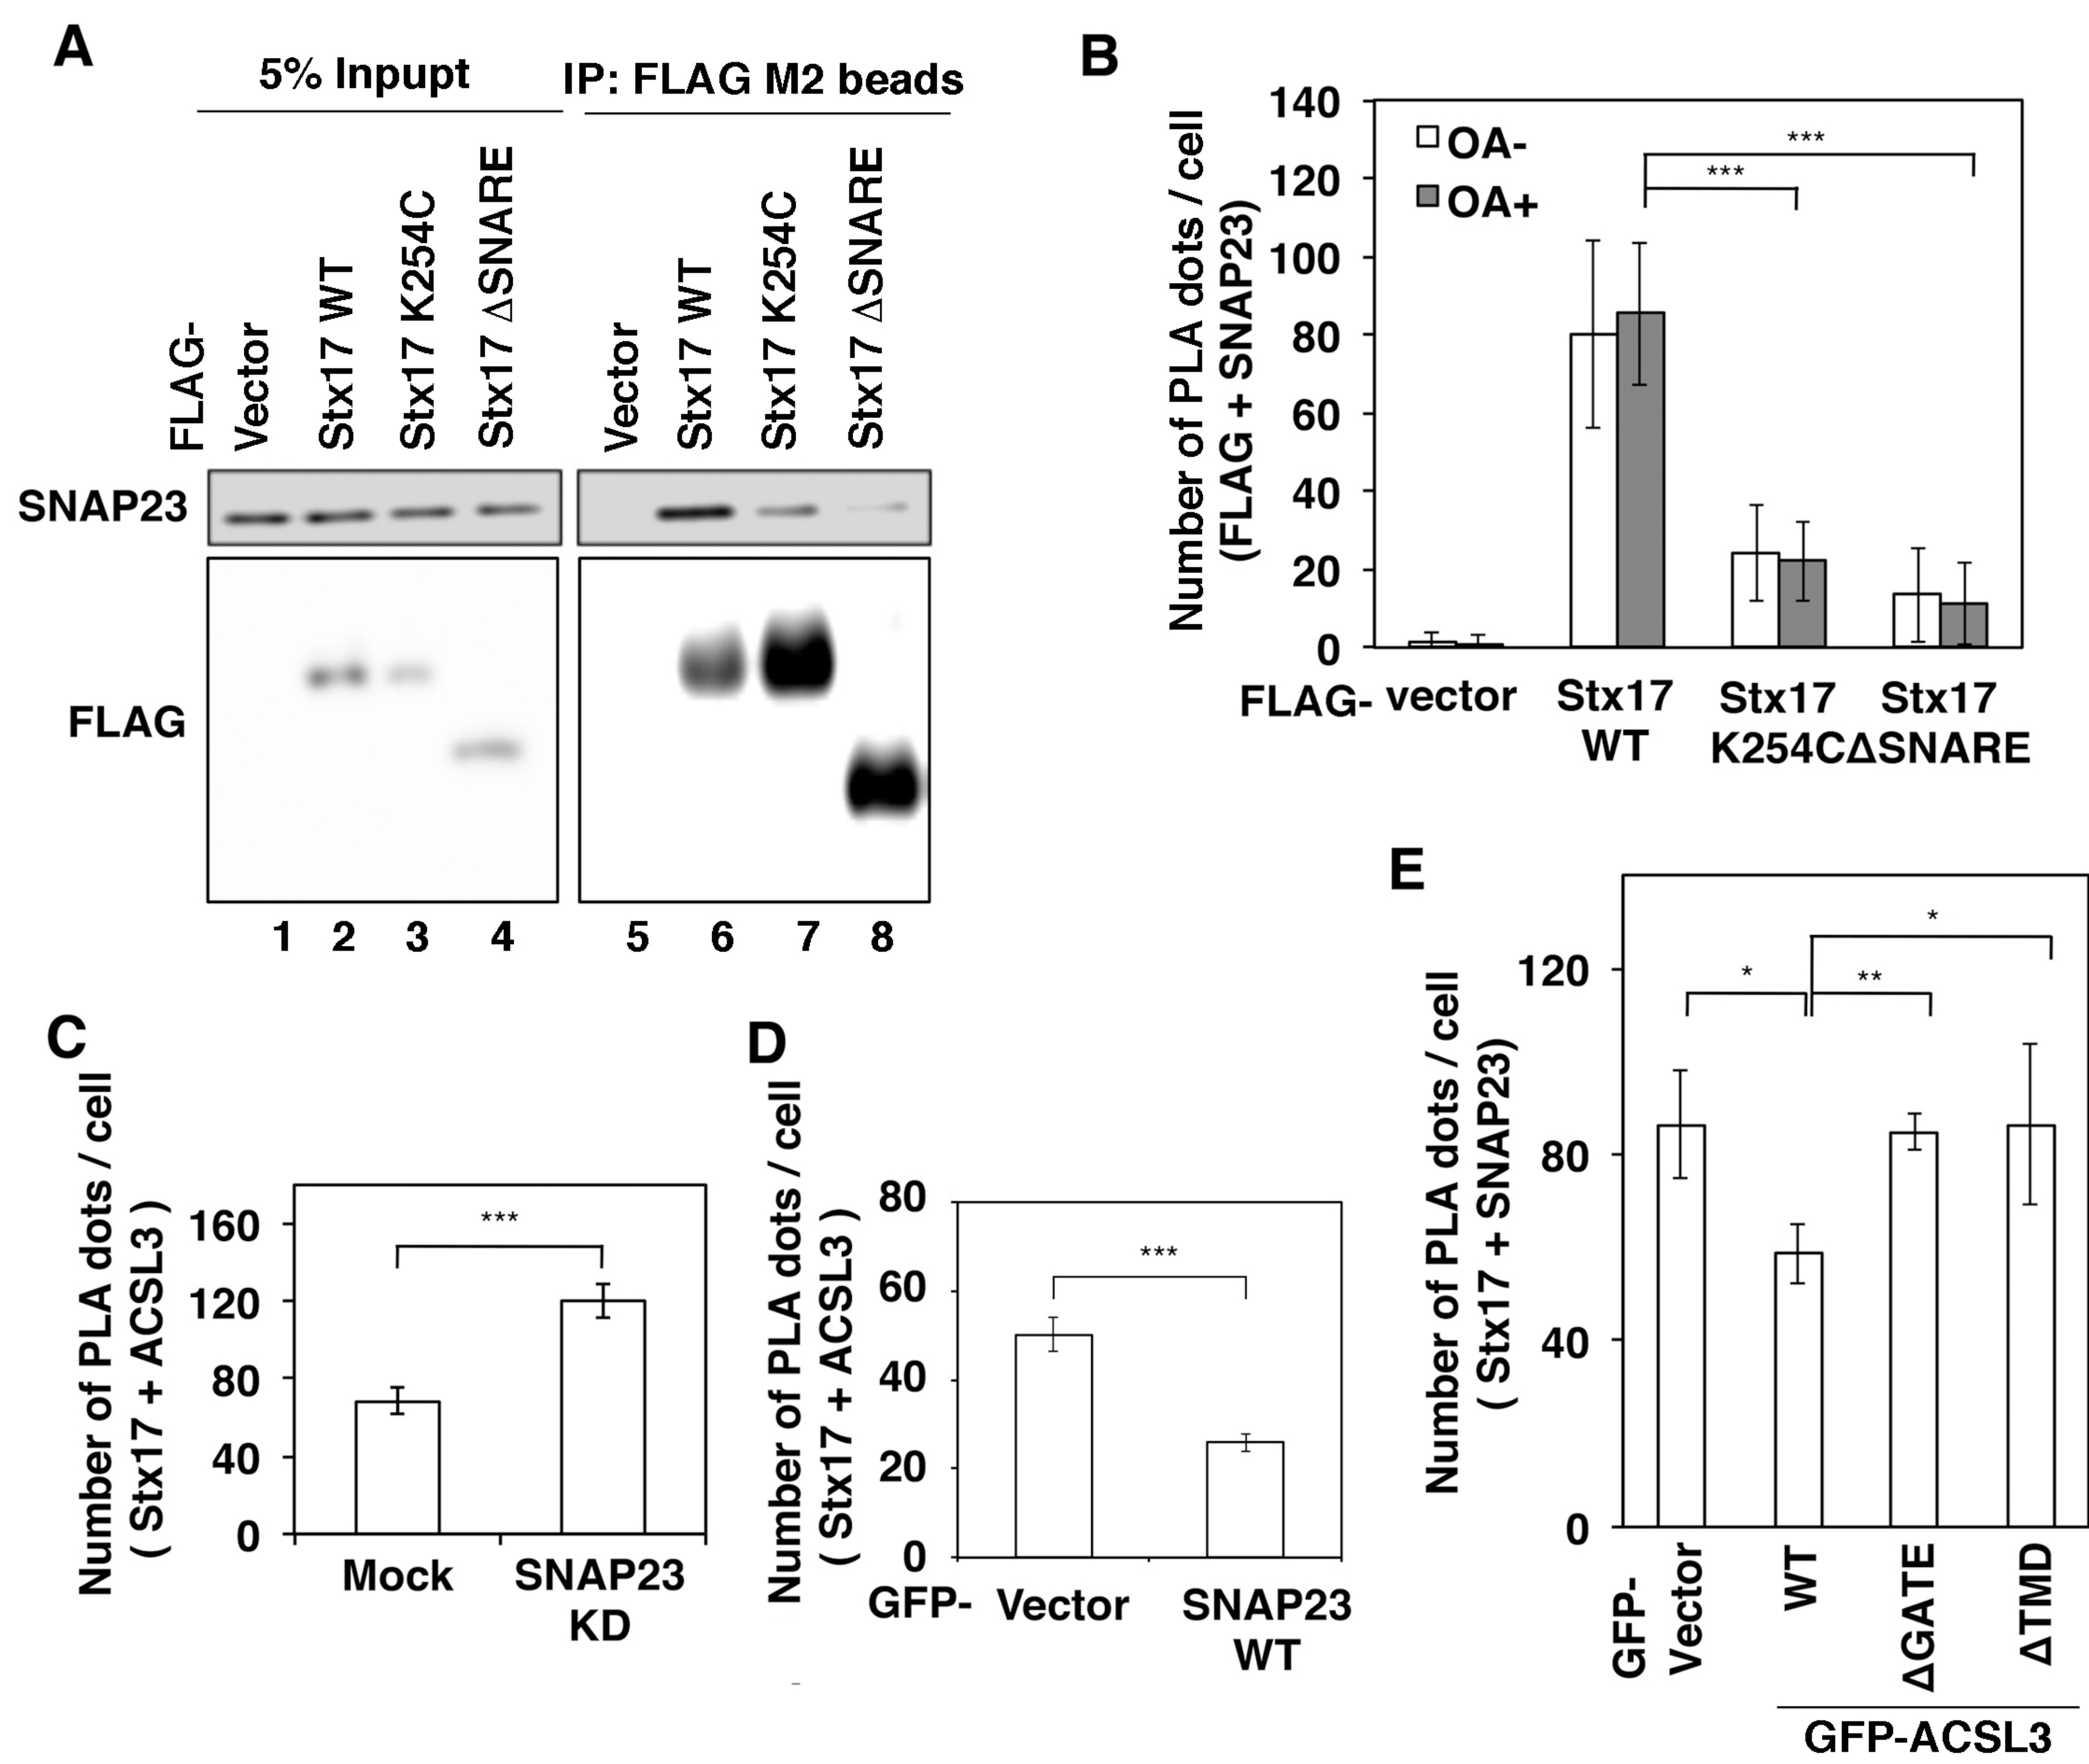



# Figure 6

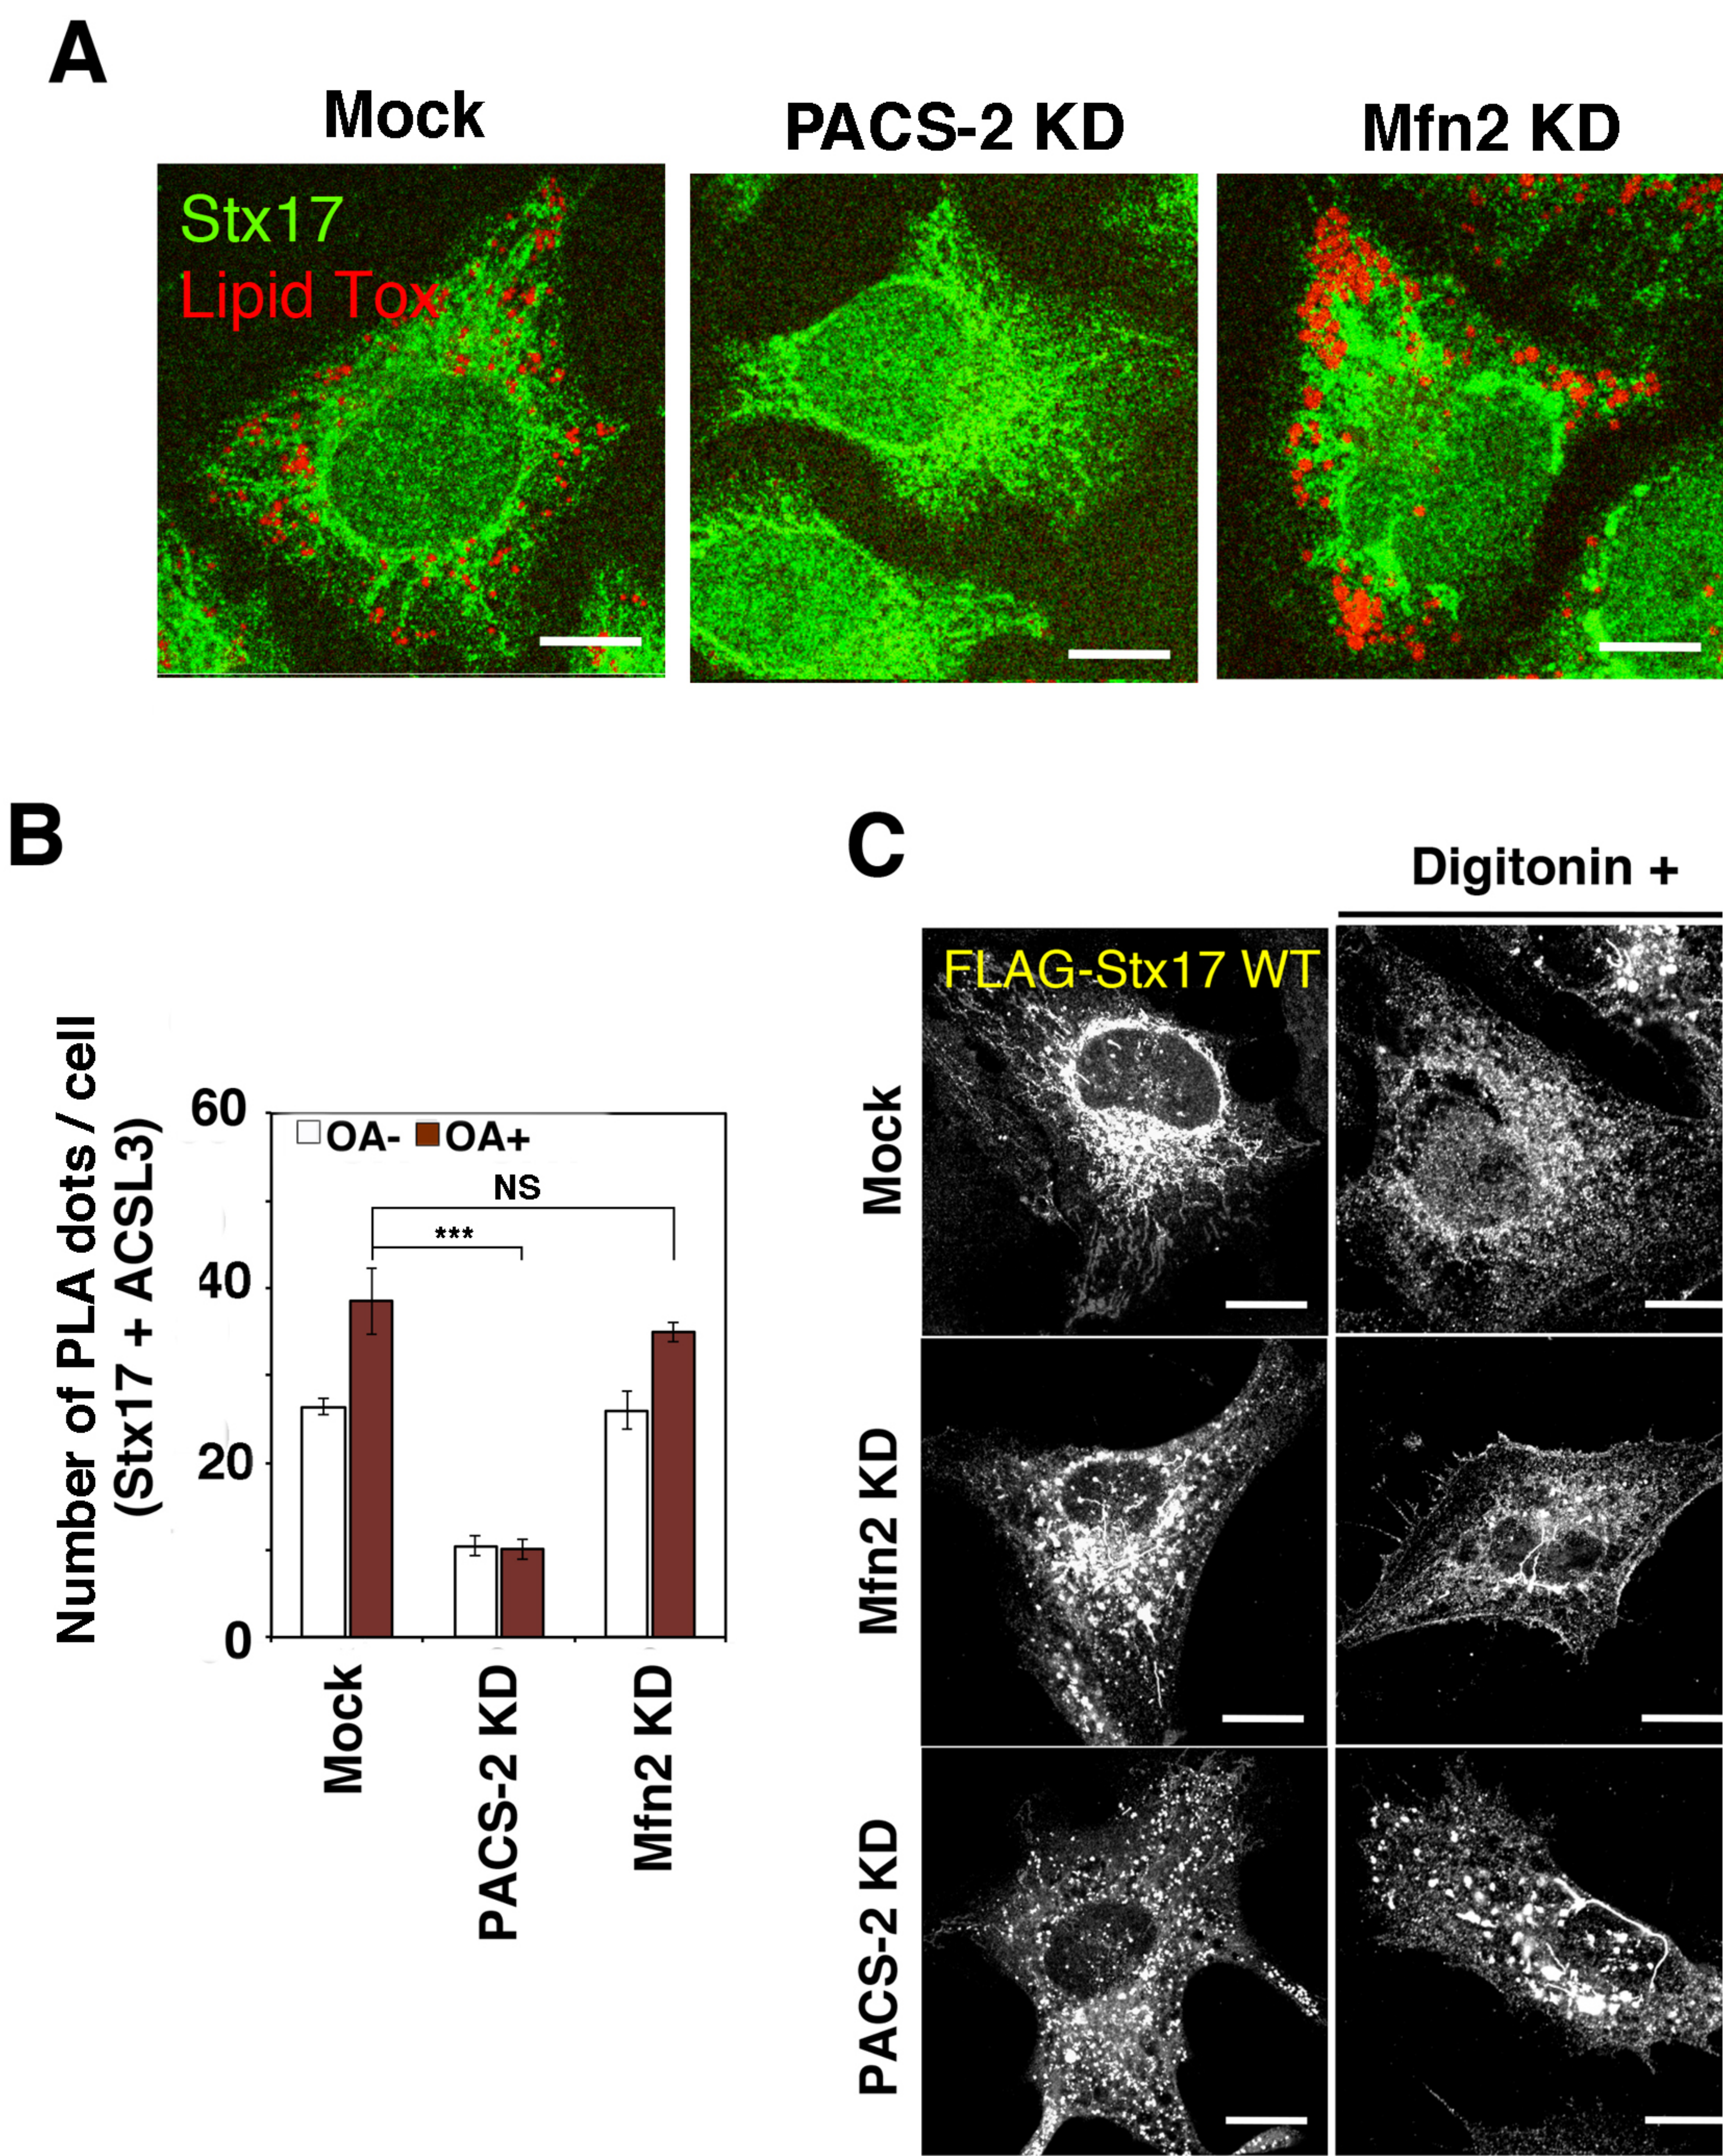



Figure 7

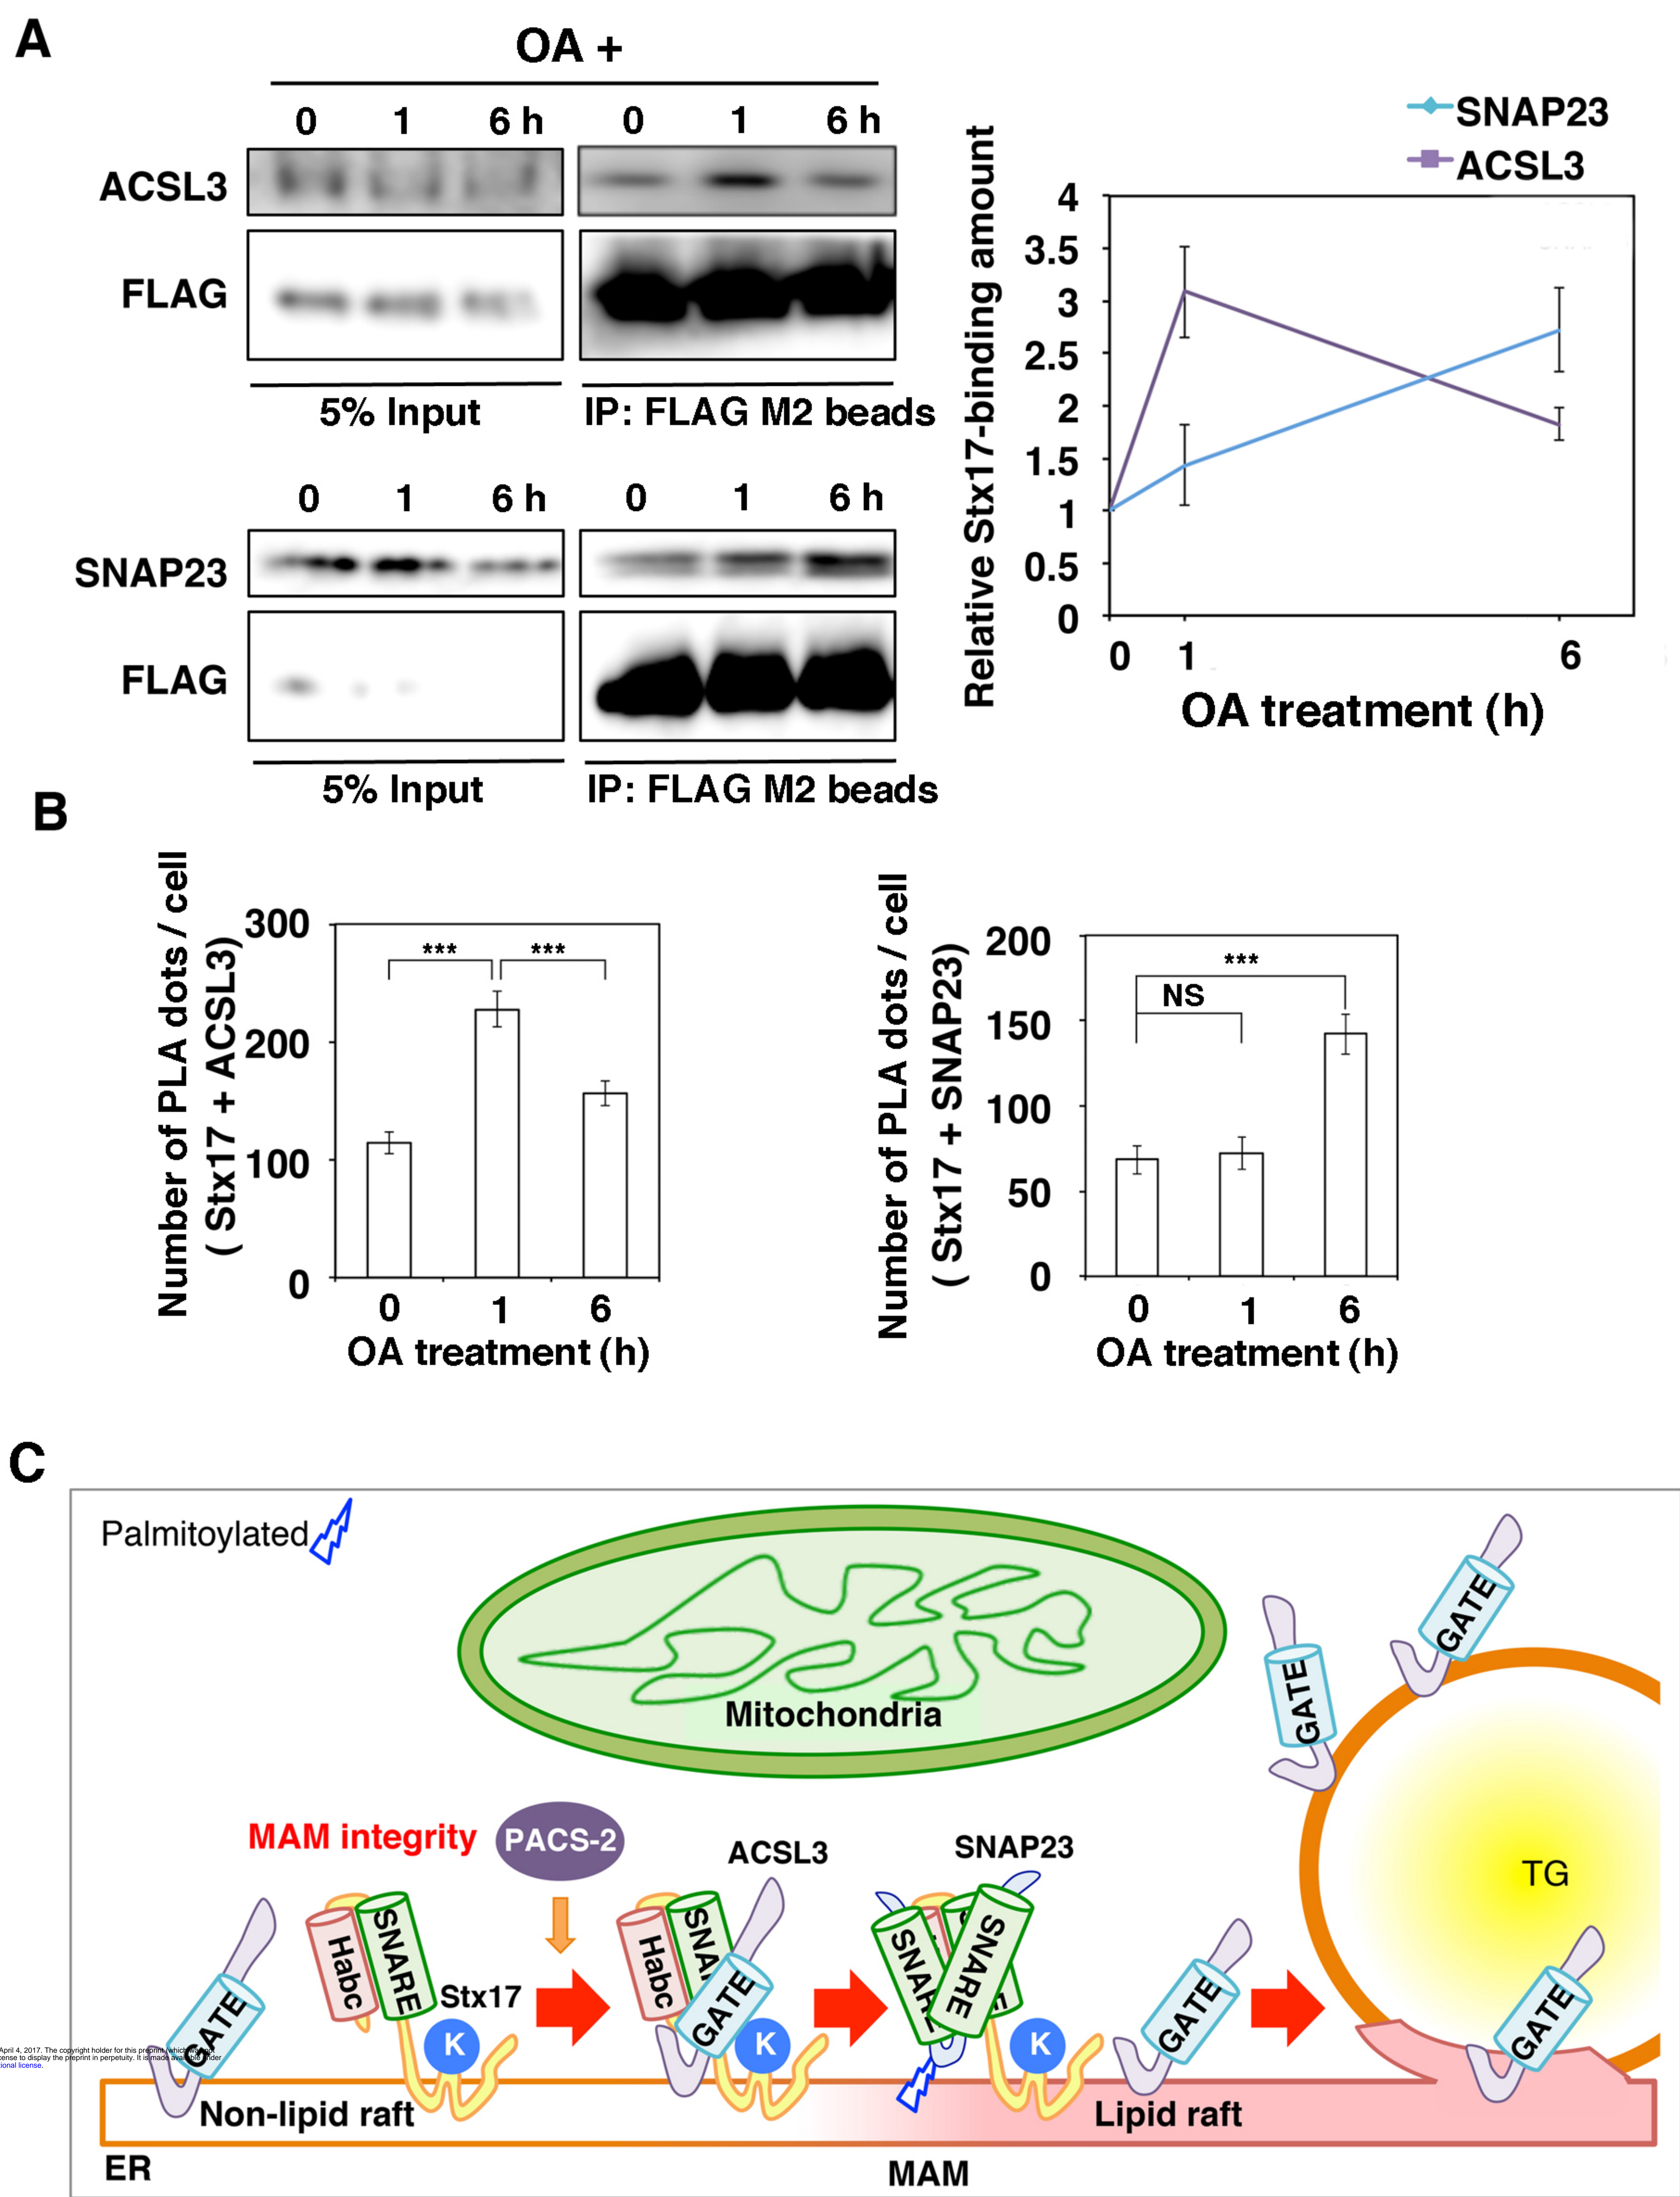

Source: http://www.biorxiv.org/content/10.1101/124065v1.full.pdf
